# Supplementary material for: A unified surface tension model for multi-component salt, organic, and surfactant solutions
Source: Royal Society of Chemistry journal article supplement (doi:10.1039/d4cp00678j), 2024-01-01
Supplement: d4cp00678j1.pdf [file d4cp00678j1.pdf]

# A unified surface tension model for multi-component salt, organic, and surfactant solutions

## Supplemental Material

Judith Kleinheins,<sup>\*a</sup> Claudia Marcolli,<sup>a</sup> Cari S. Dutcher,<sup>b</sup> Nadia Shardt<sup>c</sup>

<sup>a</sup> *Institute for Atmospheric and Climate Science, ETH Zürich, Universitätstrasse 16, 8092 Zürich, Switzerland. E-mail: judith.kleinheins@env.ethz.ch*

<sup>b</sup> *Department of Mechanical Engineering and Department of Chemical Engineering and Materials Science, University of Minnesota, Twin Cities, Minneapolis, MN 55455, USA*

<sup>c</sup> *Department of Chemical Engineering, Norwegian University of Science and Technology (NTNU), 7491 Trondheim, Norway*

### Contents

|                                                                         |           |
|-------------------------------------------------------------------------|-----------|
| <b>S1 Relationship between the Sigmoid model and the Eberhart model</b> | <b>2</b>  |
| <b>S2 Derivation of the multi-component Eberhart model</b>              | <b>3</b>  |
| <b>S3 Experimental surface tension data of multi-component systems</b>  | <b>5</b>  |
| S3.1 Ternary mixtures . . . . .                                         | 5         |
| S3.2 Higher order mixtures . . . . .                                    | 10        |
| <b>S4 Comparison of the Eberhart and Connors-Wright models</b>          | <b>11</b> |
| S4.1 Water–acetonitrile–1,2-ethanediol . . . . .                        | 11        |
| S4.2 Water–n-butyl acetate–methanol . . . . .                           | 12        |
| <b>S5 Binary Eberhart model fits</b>                                    | <b>13</b> |
| S5.1 Binary fits for water–organic–organic systems . . . . .            | 13        |
| S5.2 Binary fits for water–surfactant–surfactant systems . . . . .      | 14        |
| S5.3 Binary fits for water–organic–salt systems . . . . .               | 15        |
| S5.4 Binary fits for water–surfactant–salt systems . . . . .            | 16        |
| S5.5 Binary fits for water–surfactant–organic systems . . . . .         | 17        |
| S5.6 Binary fits for a quaternary system . . . . .                      | 18        |
| <b>S6 Additional tables and figures for ternary systems</b>             | <b>19</b> |
| S6.1 Ternary system properties tables . . . . .                         | 19        |
| S6.2 Water–surfactant–surfactant . . . . .                              | 20        |
| S6.3 Water–organic–salt . . . . .                                       | 22        |
| S6.4 Water–surfactant–salt . . . . .                                    | 24        |
| S6.5 Water–surfactant–organic . . . . .                                 | 28        |

# S1 Relationship between the Sigmoid model and the Eberhart model

The Sigmoid model was derived by Kleinheins *et al.*<sup>1</sup> as

$$\sigma^{\text{Sig}} = \sigma_1 - (\sigma_1 - \sigma_2) \left( 10^{pd} + 1 \right) \frac{x_2^d}{10^{pd} + x_2^d}. \quad (\text{S1})$$

When plotting  $\sigma^{\text{Sig}}$  on a logarithmic  $x_2$ -axis, the function has its inflection point at a mole fraction of  $x_2 = 10^p$ . The parameter  $d$  is related to the distance of the CMC from the inflection point (more details see in Kleinheins *et al.*<sup>1</sup>). If  $d = 1$  is chosen, the Sigmoid model simplifies to a function that is mathematically equivalent to the Eberhart model since:

$$\sigma^{\text{Sig}}(d=1) = \sigma_1 - (\sigma_1 - \sigma_2) (10^p + 1) \frac{x_2}{10^p + x_2} \quad (\text{S2})$$

$$\sigma^{\text{Sig}}(d=1) = \frac{\sigma_1 (10^p + x_2)}{10^p + x_2} - \frac{(\sigma_1 - \sigma_2) (10^p + 1) x_2}{10^p + x_2} \quad (\text{S3})$$

$$\sigma^{\text{Sig}}(d=1) = \frac{10^p \sigma_1 + x_2 \sigma_1 - x_2 (\sigma_1 - \sigma_2) 10^p - x_2 (\sigma_1 - \sigma_2)}{10^p + x_2} \quad (\text{S4})$$

$$\sigma^{\text{Sig}}(d=1) = \frac{10^p (\sigma_1 - x_2 (\sigma_1 - \sigma_2)) + x_2 \sigma_2}{10^p + x_2}. \quad (\text{S5})$$

Under the assumption of  $10^p = 1/(S_{12} - 1)$ , we get

$$\sigma^{\text{Sig}}(d=1) = \frac{\frac{1}{S_{12}-1} (\sigma_1 - x_2 (\sigma_1 - \sigma_2)) + x_2 \sigma_2}{\frac{1}{S_{12}-1} + x_2} \quad (\text{S6})$$

which can be rearranged to

$$\sigma^{\text{Sig}}(d=1) = \frac{\sigma_1 (1 - x_2) + \sigma_2 S_{12} x_2}{(1 - x_2) + S_{12} x_2} = \sigma^{\text{Eb}}. \quad (\text{S7})$$

Thus, the Sigmoid model reduces to the Eberhart model, with  $d = 1$  and  $10^p = 1/(S_{12} - 1)$ .

To verify if  $1/(S_{12} - 1)$  is also related to the inflection point of the Eberhart model, we derive the inflection point of the Eberhart model on a logarithmic  $x_2$ -axis as follows. The Eberhart model can be written as

$$\sigma^{\text{Eb}} = \frac{x_2 (S_{12} \sigma_2 - \sigma_1) + \sigma_1}{x_2 (S_{12} - 1) + 1}. \quad (\text{S8})$$

Since the inflection point is defined for a logarithmic  $x_2$ -scale, we introduce a new variable  $y$  defined as

$$y = \log_{10} x_2, \quad (\text{S9})$$

which leads to

$$\sigma^{\text{Eb}} = \frac{10^y (S_{12} \sigma_2 - \sigma_1) + \sigma_1}{10^y (S_{12} - 1) + 1}. \quad (\text{S10})$$

The first derivative of Equation S10 is

$$\frac{\partial \sigma}{\partial y} = \ln(10) S_{12} (\sigma_2 - \sigma_1) \frac{10^y}{(10^y (S_{12} - 1) + 1)^2}, \quad (\text{S11})$$

and the second derivative gives

$$\frac{\partial^2 \sigma}{\partial y^2} = \ln(10)^2 S_{12} (\sigma_2 - \sigma_1) \frac{-10^y (10^y (S_{12} - 1) - 1)}{(10^y (S_{12} - 1) + 1)^3}. \quad (\text{S12})$$

The inflection point  $\hat{p}$  of the Eberhart model is given by

$$\frac{\partial^2 \sigma}{\partial y^2} (y = \hat{p}) = 0 \quad (\text{S13})$$

leading to

$$\ln(10)^2 S_{12} (\sigma_2 - \sigma_1) \frac{-10^{\hat{p}} (10^{\hat{p}} (S_{12} - 1) - 1)}{(10^{\hat{p}} (S_{12} - 1) + 1)^3} = 0 \quad (\text{S14})$$

$$10^{\hat{p}} (S_{12} - 1) - 1 = 0 \quad (\text{S15})$$

and finally

$$10^{\hat{p}} = \frac{1}{S_{12} - 1} = 10^p, \quad (\text{S16})$$

showing that the inflection point of the Eberhart model is given by  $1/(S_{12} - 1)$  and equal to the inflection point of the Sigmoid model.

## S2 Derivation of the multi-component Eberhart model

Through analogy to the Connors-Wright model<sup>2,3</sup> and the Chunxi model<sup>4</sup>, the multi-component Eberhart model was derived. The relationship between these models and their main assumptions in the derivation are summarized in Fig. S1 and described in the following.

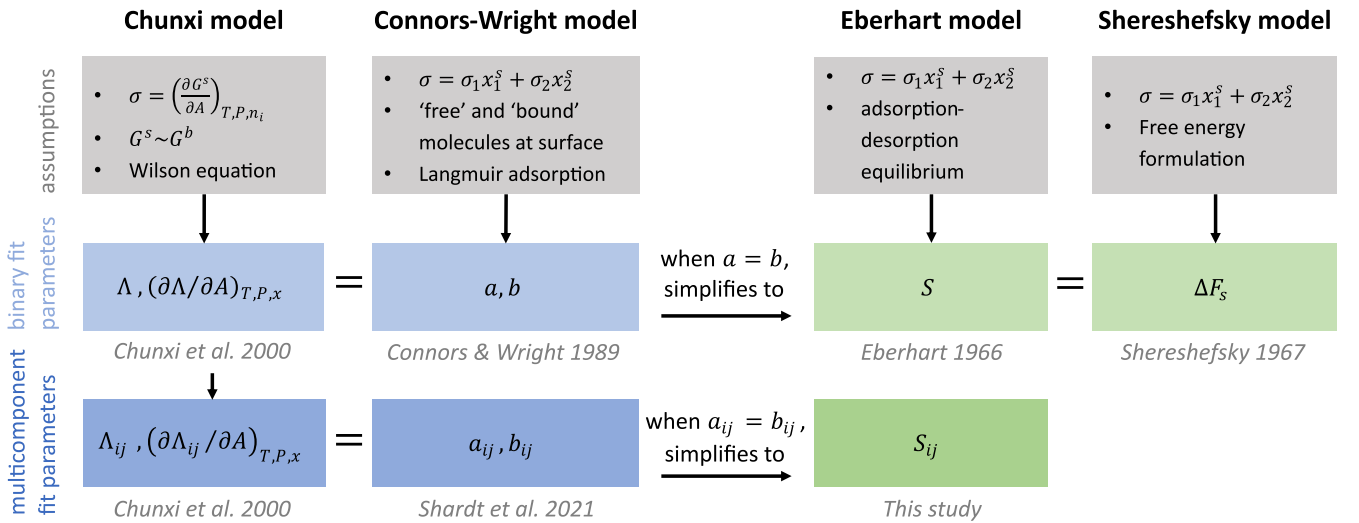

Figure S1: Overview of the four models discussed in Section S2 (columns) and an illustration of their relationships. The first row summarizes some basic assumptions in the derivation of the binary models. The second and third row show the fit parameters and the reference to the first publication of the binary and multi-component versions of the models, respectively. Equal signs indicate that the two respective models are mathematically equivalent.

In 2000, a multi-component model was derived by Chunxi *et al.*<sup>4</sup> by assuming that the Gibbs free energy in the surface  $G^s$  is proportional to the one in the bulk  $G^b$ . The surface tension was defined as the change of  $G^s$  with area  $A$  at constant temperature  $T$ , pressure  $P$  and mole number  $n_i$ :

$$\sigma = \left(\frac{\partial G^s}{\partial A}\right)_{T,P,n_i}. \quad (\text{S17})$$

For the molar excess Gibbs energy, the Wilson equation<sup>5</sup> was assumed to be valid. The resulting model is written as

$$\sigma = \sum_{i=1}^n x_i \sigma_i - RT \sum_{i=1}^n \left( \frac{x_i}{\sum_{j=1}^n x_j \Lambda_{ij}} \sum_{j=1}^n x_j \left(\frac{\partial \Lambda_{ij}}{\partial A}\right)_{T,P,x} \right) \quad (\text{S18})$$

where  $\Lambda_{ij}$  and  $\left(\frac{\partial\Lambda_{ij}}{\partial A}\right)_{T,P,x}$  are fit parameters for the binary surface tension of substances  $i$  and  $j$ , with  $\Lambda_{ii} = 1$ , and  $\left(\frac{\partial\Lambda_{ii}}{\partial A}\right)_{T,P,x} = 0$ . Analyzing the equations given in Chunxi *et al.*<sup>4</sup> for a binary system, the following conversion rules can be derived:

$$\Lambda_{ij} = 1/\Lambda_{ji}, \quad \left(\frac{\partial\Lambda_{ij}}{\partial A}\right)_{T,P,x} = -(\Lambda_{ij})^2 \left(\frac{\partial\Lambda_{ji}}{\partial A}\right)_{T,P,x}. \quad (\text{S19})$$

By comparison of the binary surface tension equations of the Chunxi and Connors-Wright models, it has been found that the models are mathematically equivalent<sup>6</sup>, with

$$a_{ij} = 1 - \Lambda_{ji}, \quad b_{ij} = -\frac{RT}{\sigma_j - \sigma_i} \left(\frac{\partial\Lambda_{ji}}{\partial A}\right)_{T,P,x} \left[1 - \frac{1}{\Lambda_{ji}}\right], \quad (\text{S20})$$

where  $a_{ij}$  and  $b_{ij}$  replace the original fit parameters  $a$  and  $b$  of the Connors-Wright model<sup>2</sup>. By combination of Equations S18, S19, and S20, a multi-component Connors-Wright model has been derived<sup>3</sup>, which, following the naming conventions in this paper, reads as

$$\sigma = \sum_{i=1}^n \sigma_i x_i + \sum_{i=1}^n \left( \frac{x_i}{\sum_{j=1}^n x_j (1 - a_{ji})} \sum_{j=1}^n x_j \frac{b_{ji}}{a_{ji}} (a_{ji} - 1) (\sigma_j - \sigma_i) \right). \quad (\text{S21})$$

The binary Eberhart model was found to be a simplified version of the binary Connors-Wright model<sup>1</sup>. Setting the two fit parameters  $a$  and  $b$  in the Connors-Wright model equal, the model reduces to the Eberhart model and its fit parameter  $S$  relates to  $a$  and  $b$  as

$$a = b = 1 - 1/S. \quad (\text{S22})$$

Analogously, by setting  $a_{ij}$  equal to  $b_{ij}$  in Equation S21, the multi-component Eberhart model (Equation 6 in the main paper) was derived.

The Shereshefsky model is mathematically equivalent to the Eberhart model<sup>1</sup> with  $S = \exp(\Delta F_s/RT)$ . As such, a multi-component Shereshefsky model could be formulated as well by simple conversion of the fit parameters.

## S3 Experimental surface tension data of multi-component systems

### S3.1 Ternary mixtures

Table S1: Experimental surface tension data of **inorganic–inorganic–water** systems in the literature: Sources, components, measurement temperature  $T$ , and number of measured data points  $N_p$

| No. | Source                                 | Components                                                                                | $T$ (°C) | $N_p$ |
|-----|----------------------------------------|-------------------------------------------------------------------------------------------|----------|-------|
| 1   | Belton <sup>7</sup>                    | NaCl, KCl, water                                                                          | 25       | 12    |
| 2   | Belton <sup>7</sup>                    | HCl, NaCl, water                                                                          | 25       | 15    |
| 3   | Belton <sup>8</sup>                    | NaCl, HCl, water                                                                          | 25       | 5     |
| 4   | Belton <sup>8</sup>                    | KCl, HCl, water                                                                           | 25       | 4     |
| 5   | Boyer <i>et al.</i> <sup>9</sup>       | NH <sub>4</sub> NO <sub>3</sub> , (NH <sub>4</sub> ) <sub>2</sub> SO <sub>4</sub> , water |          | 4     |
| 6   | Dutcher <i>et al.</i> <sup>10</sup>    | KNO <sub>3</sub> , NH <sub>4</sub> Cl, water                                              | 18       | 10    |
| 7   | Dutcher <i>et al.</i> <sup>10</sup>    | NaNO <sub>3</sub> , (NH <sub>4</sub> ) <sub>2</sub> SO <sub>4</sub> , water               | 18       | 9     |
| 8   | Dutcher <i>et al.</i> <sup>10</sup>    | NH <sub>4</sub> Cl, (NH <sub>4</sub> ) <sub>2</sub> SO <sub>4</sub> , water               | 18       | 10    |
| 9   | Dutcher <i>et al.</i> <sup>10</sup>    | HNO <sub>3</sub> , KNO <sub>3</sub> , water                                               | 20-80    | 244   |
| 10  | Dutcher <i>et al.</i> <sup>10</sup>    | KNO <sub>3</sub> , NH <sub>4</sub> NO <sub>3</sub> , water                                | 20-80    | 143   |
| 11  | Hyvärinen <i>et al.</i> <sup>11</sup>  | H <sub>2</sub> SO <sub>4</sub> , NH <sub>3</sub> , water                                  | 25       | 42    |
| 12  | Martin <i>et al.</i> <sup>12</sup>     | H <sub>2</sub> SO <sub>4</sub> , HNO <sub>3</sub> , water                                 | 20.15    | 20    |
| 13  | Martin <i>et al.</i> <sup>12</sup>     | H <sub>2</sub> SO <sub>4</sub> , HNO <sub>3</sub> , water                                 | 20.15    | 20    |
| 14  | Matubayasi <i>et al.</i> <sup>13</sup> | NaCl, Na <sub>2</sub> SO <sub>4</sub> , water                                             | 15-35    | 12    |
| 15  | Matubayasi <i>et al.</i> <sup>13</sup> | NaCl, NaI, water                                                                          | 15-35    | 9     |
| 16  | Nehma <i>et al.</i> <sup>14</sup>      | NH <sub>4</sub> NO <sub>3</sub> , NaNO <sub>3</sub> , water                               | 25       | 6     |

Table S2: Experimental surface tension data of **surfactant–surfactant–water** systems in the literature: Sources, components, measurement temperature  $T$ , and number of measured data points  $N_p$

| No. | Source                                  | Components                          | $T$ ( $^{\circ}\text{C}$ ) | $N_p$ |
|-----|-----------------------------------------|-------------------------------------|----------------------------|-------|
| 1   | Alam <i>et al.</i> <sup>15</sup>        | SDS, CTAB, water                    | 25                         | 38    |
| 2   | Bagheri and Abolhasani <sup>16</sup>    | C14PC, TX100, water                 | 25                         | >180  |
| 3   | Bagheri and Abolhasani <sup>16</sup>    | C16PC, TX100, water                 | 25                         | >180  |
| 4   | Das <i>et al.</i> <sup>17</sup>         | CPC, TTAB, water                    | 29.85                      | 13    |
| 5   | Das <i>et al.</i> <sup>17</sup>         | DPC, TTAB, water                    | 29.85                      | 11    |
| 6   | Das <i>et al.</i> <sup>17</sup>         | CPC, DPC, water                     | 29.85                      | 8     |
| 7   | El Haber <i>et al.</i> <sup>18</sup>    | SDS, CTAC, water                    | 24                         | 41    |
| 8   | El Haber <i>et al.</i> <sup>18</sup>    | Triton-X-114, SDS, water            | 24                         | 73    |
| 9   | Fainerman <i>et al.</i> <sup>19</sup>   | SdeS, SDS, water                    |                            | 12    |
| 10  | Funasaki and Hada <sup>20</sup>         | DeMS, De7, water                    | 30                         | 50    |
| 11  | Jańczuk <i>et al.</i> <sup>21</sup>     | SDDS, SDS, water                    | 20                         | 72    |
| 12  | Jańczuk <i>et al.</i> <sup>21</sup>     | SDDS, TX100, water                  | 20                         | 59    |
| 13  | Mulqueen and Blankschtein <sup>22</sup> | SDS, C12E6, water                   | 25                         | 28    |
| 14  | Mulqueen and Blankschtein <sup>22</sup> | SDS, C12Maltoside, water            | 25                         | 45    |
| 15  | Mulqueen and Blankschtein <sup>23</sup> | C12Maltoside, C12Betaine, water     | 25                         | 13    |
| 16  | Mulqueen and Blankschtein <sup>23</sup> | SDS, C12Betaine, water              | 25                         | 7     |
| 17  | Siddiqui and Franses <sup>24</sup>      | TritonX100 C12EO5, water            | 25                         | 33    |
| 18  | Siddiqui and Franses <sup>24</sup>      | SDS, C12E8, water                   |                            | 35    |
| 19  | Szymczyk <i>et al.</i> <sup>25</sup>    | CTAB, CPyB, water                   | 20                         | 61    |
| 20  | Szymczyk and Jańczuk <sup>26</sup>      | CTAB, TX100, water                  | 20                         | 55    |
| 21  | Szymczyk and Jańczuk <sup>27</sup>      | TX100, TX165, water                 | 20                         | 64    |
| 22  | Szymczyk and Jańczuk <sup>28</sup>      | CTAB, TX165, water                  | 20                         | 15    |
| 23  | Szymczyk <sup>29</sup>                  | Zonyl FSN-100, TX100, water         | 20                         | 18    |
| 24  | Szymczyk <sup>29</sup>                  | Zonyl FSO-100, TX100, water         | 20                         | 18    |
| 25  | Szymczyk <sup>29</sup>                  | Zonyl FSN-100, TX165, water         | 20                         | 18    |
| 26  | Szymczyk <sup>29</sup>                  | Zonyl FSO-100, TX165, water         | 20                         | 18    |
| 27  | Szymczyk <i>et al.</i> <sup>30</sup>    | CTAB, TX-100, water                 | 20                         | 15    |
| 28  | Taraba and Szymczyk <sup>31</sup>       | Zonyl FSN-100, Zonyl FSO-100, water | 20                         | 64    |
| 29  | Tyagi <i>et al.</i> <sup>32</sup>       | SDS, DDAO, water                    | 25                         | 53    |
| 30  | Zakharova <i>et al.</i> <sup>33</sup>   | Brij35, SDS, water                  | 25                         | 60    |
| 31  | Zhang and Zhao <sup>34</sup>            | C8PyBr, C8SNa, water                | 30                         | 34    |
| 32  | Zhang and Zhao <sup>34</sup>            | C6PyBr, C7FNa, water                | 30                         | 17    |
| 33  | Zhang and Zhao <sup>34</sup>            | C6PyBr, C10SNa, water               | 30                         | 11    |

Table S3: Experimental surface tension data of **organic–organic–water** systems in the literature: Sources, components, measurement temperature  $T$ , and number of measured data points  $N_p$

| No. | Source                                          | Components                             | $T$ (°C) | $N_p$ |
|-----|-------------------------------------------------|----------------------------------------|----------|-------|
| 1   | Bartovská <i>et al.</i> <sup>35</sup>           | MTBE, ethanol, water                   | 25       | 8     |
| 2   | Bartovská <i>et al.</i> <sup>35</sup>           | MTBE, tert-butanol, water              | 25       | 10    |
| 3   | Bartovská <i>et al.</i> <sup>35</sup>           | MTBE, 1-butanol, water                 | 25       | 12    |
| 4   | Bošković <i>et al.</i> <sup>36</sup>            | ethanol, octanol, water                | 25       | 15    |
| 5   | Costa <i>et al.</i> <sup>37</sup>               | n-butyl acetate, 1-propanol, water     | 50       | 29    |
| 6   | Dzhambulatov <i>et al.</i> <sup>38</sup>        | 1,4-dioxane, acetone, water            | 20       | 10    |
| 7   | Dzhambulatov <i>et al.</i> <sup>38</sup>        | glycerol, ethanol, water               | 20       | 30    |
| 8   | El Haber <i>et al.</i> <sup>18</sup>            | glutaric acid, oxalic acid, water      | 24       | 39    |
| 9   | Enders <i>et al.</i> <sup>39</sup>              | acetone, toluene, water                | 15       | 32    |
| 10  | Enders <i>et al.</i> <sup>39</sup>              | acetone, toluene, water                | 25       | 32    |
| 11  | Enders <i>et al.</i> <sup>39</sup>              | acetone, toluene, water                | 35       | 32    |
| 12  | Enders <i>et al.</i> <sup>39</sup>              | acetone, toluene, water                | 45       | 32    |
| 13  | Enders <i>et al.</i> <sup>39</sup>              | acetone, toluene, water                | 55       | 31    |
| 14  | Ernst <i>et al.</i> <sup>40</sup>               | glycerol, ethanol, water               | 25       | 36    |
| 15  | Fainerman <i>et al.</i> <sup>19</sup>           | 1-heptanol, 1-octanol, water           |          | 51    |
| 16  | Golmaghani-Ebrahimi <i>et al.</i> <sup>41</sup> | acetonitrile, methanol, water          | 25       | 44    |
| 17  | Golmaghani-Ebrahimi <i>et al.</i> <sup>41</sup> | acetonitrile, ethanol, water           | 25       | 45    |
| 18  | Gómez-Díaz and Navaza <sup>42</sup>             | hexamethylenetetramine, ethanol, water | 20       | 22    |
| 19  | Gómez-Díaz and Navaza <sup>42</sup>             | hexamethylenetetramine, ethanol, water | 30       | 22    |
| 20  | Gómez-Díaz and Navaza <sup>42</sup>             | hexamethylenetetramine, ethanol, water | 40       | 22    |
| 21  | Gómez-Díaz and Navaza <sup>42</sup>             | hexamethylenetetramine, ethanol, water | 50       | 22    |
| 22  | Hey and Kippax <sup>43</sup>                    | n-pentanol, tert-butanol, water        | 25       | >100  |
| 23  | Johnson <i>et al.</i> <sup>44</sup>             | n-butyl acetate, 1-propanol, water     | 30       | 43    |
| 24  | Kharin <i>et al.</i> <sup>45</sup>              | ethanol, methanol, water               | 5        | 28    |
| 25  | Kharin <i>et al.</i> <sup>45</sup>              | ethanol, methanol, water               | 10       | 28    |
| 26  | Kharin <i>et al.</i> <sup>45</sup>              | ethanol, methanol, water               | 20       | 28    |
| 27  | Kharin <i>et al.</i> <sup>45</sup>              | ethanol, methanol, water               | 30       | 28    |
| 28  | Kharin <i>et al.</i> <sup>45</sup>              | ethanol, methanol, water               | 40       | 28    |
| 29  | Kharin <i>et al.</i> <sup>45</sup>              | ethanol, methanol, water               | 50       | 28    |
| 30  | Kharin <i>et al.</i> <sup>45</sup>              | ethanol, methanol, water               | 60       | 28    |
| 31  | Kijevcanin <i>et al.</i> <sup>46</sup>          | ethyl butyrate, methanol, water        | 30       | 33    |
| 32  | Kijevcanin <i>et al.</i> <sup>47</sup>          | ethyl propionate, methanol, water      | 30       | 33    |
| 33  | Lamperski <sup>48</sup>                         | acetone, propionic acid, water         |          | 23    |
| 34  | Rafati <i>et al.</i> <sup>49</sup>              | acetonitrile, 2-propanol, water        | 25       | 32    |
| 35  | Rafati <i>et al.</i> <sup>50</sup>              | acetonitrile, 1,2-ethandiol, water     | 25       | 52    |
| 36  | Santos <i>et al.</i> <sup>51</sup>              | n-butyl acetate, methanol, water       | 30       | 48    |
| 37  | Santos <i>et al.</i> <sup>51</sup>              | n-pentyl acetate, methanol, water      | 30       | 26    |

Table S4: Experimental surface tension data of **surfactant–organic–water** systems in the literature: Sources, components, measurement temperature  $T$ , and number of measured data points  $N_p$

| No. | Source                                 | Components                         | $T$ (°C) | $N_p$ |
|-----|----------------------------------------|------------------------------------|----------|-------|
| 1   | Beiranvand <i>et al.</i> <sup>52</sup> | PEG 300, Triton CG-110, water      | 20       | 8     |
| 2   | Beiranvand <i>et al.</i> <sup>52</sup> | PEG 300, DDAB, water               | 20       | 9     |
| 3   | Beiranvand <i>et al.</i> <sup>52</sup> | PEG 300, SDS, water                | 20       | 8     |
| 4   | Bielawska <i>et al.</i> <sup>53</sup>  | CTAB, methanol                     | 19.85    | >200  |
| 5   | Bielawska <i>et al.</i> <sup>53</sup>  | CTAB, ethanol                      | 19.85    | >200  |
| 6   | Bielawska <i>et al.</i> <sup>53</sup>  | CTAB, 1-propanol                   | 19.85    | >200  |
| 7   | Bzdek <i>et al.</i> <sup>54</sup>      | Triton-X-100, glutaric acid, water |          | 27    |
| 8   | El Haber <i>et al.</i> <sup>18</sup>   | TritonX100, glutaric acid, water   | 24       | 101   |
| 9   | El Haber <i>et al.</i> <sup>18</sup>   | TritonX114, glutaric acid, water   | 24       | 27    |
| 10  | El Haber <i>et al.</i> <sup>18</sup>   | Brij35, glutaric acid, water       | 24       | 80    |
| 11  | El Haber <i>et al.</i> <sup>18</sup>   | TritonX100, oxalic acid, water     | 24       | 63    |
| 12  | El Haber <i>et al.</i> <sup>18</sup>   | Brij35, oxalic acid, water         | 24       | 49    |
| 13  | El Haber <i>et al.</i> <sup>18</sup>   | CTAC, oxalic acid, water           | 24       | 56    |
| 14  | El Haber <i>et al.</i> <sup>18</sup>   | SDS, oxalic acid, water            | 24       | 45    |
| 15  | Khosharay <i>et al.</i> <sup>55</sup>  | CTAB, 1-propanol, water            | 25       | 46    |
| 16  | Khosharay <i>et al.</i> <sup>55</sup>  | CTAB, 2-propanol, water            | 25       | 46    |
| 17  | Khosharay <i>et al.</i> <sup>55</sup>  | CTAB, 1-butanol, water             | 25       | 47    |
| 18  | Kwaśniewska and Kiewlicz <sup>56</sup> | SDS, ascorbic acid, water          | 24.35    | 28    |
| 19  | Kwaśniewska and Kiewlicz <sup>56</sup> | SDS, 3-O-ethyl ascorbate, water    | 24.35    | 33    |
| 20  | Kwaśniewska and Kiewlicz <sup>56</sup> | SDS, ascorbyl glucoside, water     | 24.35    | 25    |
| 21  | Kwaśniewska and Kiewlicz <sup>57</sup> | CTAB, ascorbic acid, water         | 25.85    | 15    |
| 22  | Kwaśniewska and Kiewlicz <sup>57</sup> | CTAB, 3-O-ethyl ascorbate, water   | 25.85    | 17    |
| 23  | Kwaśniewska and Kiewlicz <sup>57</sup> | CTAB, ascorbyl glucoside, water    | 25.85    | 15    |
| 24  | Wüstneck and Miller <sup>58</sup>      | SDS, n-butanol, water              |          | 29    |
| 25  | Wüstneck and Miller <sup>58</sup>      | SDS, n-hexanol, water              |          | 9     |
| 26  | Wüstneck and Miller <sup>58</sup>      | SDS, n-nonanol, water              |          | 23    |

Table S5: Experimental surface tension data of **surfactant–salt–water** systems in the literature: Sources, components, measurement temperature  $T$ , and number of measured data points  $N_p$

| No. | Source                               | Components                                                            | $T$ (°C) | $N_p$ |
|-----|--------------------------------------|-----------------------------------------------------------------------|----------|-------|
| 1   | Bzdek <i>et al.</i> <sup>54</sup>    | Triton-X-100, NaCl, water                                             |          | 24    |
| 2   | Dar <i>et al.</i> <sup>59</sup>      | C16Br, NaCl, water                                                    | 25       | 16    |
| 3   | Dar <i>et al.</i> <sup>59</sup>      | C16BzCl, NaCl, water                                                  | 25       | 14    |
| 4   | Dar <i>et al.</i> <sup>59</sup>      | Brij58, NaCl, water                                                   |          | 16    |
| 5   | El Haber <i>et al.</i> <sup>18</sup> | Triton-X-100, NaCl, water                                             | 24       | 37    |
| 6   | El Haber <i>et al.</i> <sup>18</sup> | Triton-X-100, (NH <sub>4</sub> ) <sub>2</sub> SO <sub>4</sub> , water | 24       | 11    |
| 7   | El Haber <i>et al.</i> <sup>18</sup> | Brij35, (NH <sub>4</sub> ) <sub>2</sub> SO <sub>4</sub> , water       | 24       | 16    |
| 8   | El Haber <i>et al.</i> <sup>18</sup> | Brij35, NaCl, water                                                   | 24       | 43    |
| 9   | Helvaci <i>et al.</i> <sup>60</sup>  | Rhamnolipid 1, NaCl, water                                            | 25       | 45    |
| 10  | Helvaci <i>et al.</i> <sup>60</sup>  | Rhamnolipid 2, NaCl, water                                            | 25       | 45    |
| 11  | Matijević and Pethica <sup>61</sup>  | SDS, NaCl, water                                                      | 20       | 50    |
| 12  | Matijević and Pethica <sup>61</sup>  | SDS, NaCl, water                                                      | 40       | 40    |
| 13  | Matijević and Pethica <sup>61</sup>  | SDS, NaCl, water                                                      | 60       | 43    |
| 14  | Nakahara <i>et al.</i> <sup>62</sup> | CTAB, NaBr, water                                                     | 25.05    | 74    |
| 15  | Nakahara <i>et al.</i> <sup>62</sup> | SDS, NaCl, water                                                      | 25.05    | 100   |
| 16  | Para <i>et al.</i> <sup>63</sup>     | CTAB, KCl, water                                                      | 21.85    | 149   |
| 17  | Para <i>et al.</i> <sup>63</sup>     | CTAB, KBr, water                                                      | 21.85    | 57    |
| 18  | Para <i>et al.</i> <sup>63</sup>     | CTAC, KBr, water                                                      | 21.85    | 33    |
| 19  | Para <i>et al.</i> <sup>63</sup>     | CTAC, KCl, water                                                      | 21.85    | 25    |
| 20  | Qazi <i>et al.</i> <sup>64</sup>     | CTAB, NaCl, water                                                     |          | >450  |
| 21  | Qazi <i>et al.</i> <sup>64</sup>     | Tween 80, NaCl, water                                                 |          | >240  |
| 22  | Reid <i>et al.</i> <sup>65</sup>     | CTAC, NaCl, water                                                     | 19       | 6     |
| 23  | Reid <i>et al.</i> <sup>65</sup>     | sodium oleate, NaCl, water                                            | 19       | 6     |
| 24  | Soule <i>et al.</i> <sup>66</sup>    | hexanoic acid, NaCl, water                                            | 25       | 10    |
| 25  | Soule <i>et al.</i> <sup>66</sup>    | hexanoic acid, Na <sub>2</sub> SO <sub>4</sub> , water                | 25       | 10    |



Table S6: Experimental surface tension data of **organic–salt–water** systems in the literature: Sources, components, measurement temperature  $T$ , and number of measured data points  $N_p$

| No. | Source                                | Components                                                  | $T$ ( $^{\circ}\text{C}$ ) | $N_p$ |
|-----|---------------------------------------|-------------------------------------------------------------|----------------------------|-------|
| 1   | Belton <sup>67</sup>                  | ethyl alcohol, salts(10 different), water                   | 25                         | 1-5   |
| 2   | Belton <sup>67</sup>                  | acetic acid, salts(5 different), water                      | 25                         | 1-5   |
| 3   | Belton <sup>8</sup>                   | NaCl, sucrose, water                                        | 25                         | 21    |
| 4   | Booth <i>et al.</i> <sup>68</sup>     | oxalic acid, $(\text{NH}_4)_2\text{SO}_4$ , water           | 25                         | 7     |
| 5   | Booth <i>et al.</i> <sup>68</sup>     | malonic acid, $(\text{NH}_4)_2\text{SO}_4$ , water          | 25                         | 16    |
| 6   | Booth <i>et al.</i> <sup>68</sup>     | succinic acid, $(\text{NH}_4)_2\text{SO}_4$ , water         | 25                         | 9     |
| 7   | Booth <i>et al.</i> <sup>68</sup>     | glutaric acid, $(\text{NH}_4)_2\text{SO}_4$ , water         | 25                         | 9     |
| 8   | Booth <i>et al.</i> <sup>68</sup>     | adipic acid, $(\text{NH}_4)_2\text{SO}_4$ , water           | 25                         | 3     |
| 9   | Booth <i>et al.</i> <sup>68</sup>     | glutaric acid, salts(4 different), water                    | 25                         | 1     |
| 10  | Boyer <i>et al.</i> <sup>9</sup>      | NaCl, glutaric acid, water                                  |                            | 10    |
| 11  | Ekström <i>et al.</i> <sup>69</sup>   | $(\text{NH}_4)_2\text{SO}_4$ /NaCl, mannitol, water         |                            | 9     |
| 12  | Ekström <i>et al.</i> <sup>69</sup>   | $(\text{NH}_4)_2\text{SO}_4$ /NaCl, methylerythritol, water |                            | 9     |
| 13  | Ekström <i>et al.</i> <sup>69</sup>   | $(\text{NH}_4)_2\text{SO}_4$ /NaCl, methylthreitol, water   |                            | 9     |
| 14  | Ekström <i>et al.</i> <sup>69</sup>   | $(\text{NH}_4)_2\text{SO}_4$ /NaCl, adipic acid, water      |                            | 6     |
| 15  | El Haber <i>et al.</i> <sup>18</sup>  | glutaric acid, NaCl, water                                  | 24                         | 36    |
| 16  | El Haber <i>et al.</i> <sup>18</sup>  | glutaric acid, $(\text{NH}_4)_2\text{SO}_4$ , water         | 24                         | 22    |
| 17  | Frosch <i>et al.</i> <sup>70</sup>    | $(\text{NH}_4)_2\text{SO}_4$ , oxalic acid, water           | room T.                    | 4     |
| 18  | Frosch <i>et al.</i> <sup>70</sup>    | $(\text{NH}_4)_2\text{SO}_4$ , succinic acid, water         | room T.                    | 6     |
| 19  | Frosch <i>et al.</i> <sup>70</sup>    | $(\text{NH}_4)_2\text{SO}_4$ , adipic acid, water           | room T.                    | 5     |
| 20  | Frosch <i>et al.</i> <sup>70</sup>    | $(\text{NH}_4)_2\text{SO}_4$ , citric acid, water           | room T.                    | 6     |
| 21  | Frosch <i>et al.</i> <sup>70</sup>    | $(\text{NH}_4)_2\text{SO}_4$ , NRFA, water                  | room T.                    | 7     |
| 22  | Frosch <i>et al.</i> <sup>70</sup>    | $(\text{NH}_4)_2\text{SO}_4$ , cis-pinonic acid, water      | room T.                    | 9     |
| 23  | Hyvärinen <i>et al.</i> <sup>71</sup> | sulfuric acid, dimethylamine, water                         | 25                         | 98    |
| 24  | Kiss <i>et al.</i> <sup>72</sup>      | humic acid, $(\text{NH}_4)_2\text{SO}_4$ , water            | 25                         | 19    |
| 25  | Kiss <i>et al.</i> <sup>72</sup>      | NRFA/SRFA, $(\text{NH}_4)_2\text{SO}_4$ , water             | 25                         | 12    |
| 26  | Lee <i>et al.</i> <sup>73</sup>       | NaCl, glucose, water                                        | room T.                    | 8     |
| 27  | Li <i>et al.</i> <sup>74</sup>        | acetaldehyde, $(\text{NH}_4)_2\text{SO}_4$ , water          |                            | 13    |
| 28  | Li <i>et al.</i> <sup>74</sup>        | formaldehyde, $(\text{NH}_4)_2\text{SO}_4$ , water          |                            | 13    |
| 29  | Miles <i>et al.</i> <sup>75</sup>     | glutaric acid, NaCl, water                                  | room T.                    | 30    |
| 30  | Nehma <i>et al.</i> <sup>14</sup>     | $\text{NaNO}_3$ , propylene glycol, water                   | 25                         | 5     |
| 31  | Nehma <i>et al.</i> <sup>14</sup>     | $\text{NH}_4\text{NO}_3$ , propylene glycol, water          | 25                         | 5     |
| 32  | Rublova <i>et al.</i> <sup>76</sup>   | ethylene glycol, choline chloride, water                    | 25                         | 14    |
| 33  | Rublova <i>et al.</i> <sup>76</sup>   | ethylene glycol, choline chloride, water                    | 30                         | 14    |
| 34  | Rublova <i>et al.</i> <sup>76</sup>   | ethylene glycol, choline chloride, water                    | 40                         | 14    |
| 35  | Rublova <i>et al.</i> <sup>76</sup>   | ethylene glycol, choline chloride, water                    | 50                         | 14    |
| 36  | Rublova <i>et al.</i> <sup>76</sup>   | ethylene glycol, choline chloride, water                    | 60                         | 14    |
| 37  | Rublova <i>et al.</i> <sup>76</sup>   | ethylene glycol, choline chloride, water                    | 70                         | 14    |
| 38  | Sahu <i>et al.</i> <sup>77</sup>      | 4-hydroxyacetophenone, NaCl, water                          | 22                         | 12    |
| 39  | Sareen <i>et al.</i> <sup>78</sup>    | methylglyoxal, NaCl, water                                  |                            | 10    |
| 40  | Sareen <i>et al.</i> <sup>78</sup>    | methylglyoxal, $(\text{NH}_4)_2\text{SO}_4$ , water         |                            | 10    |
| 41  | Shulman <i>et al.</i> <sup>79</sup>   | cis-pinonic acid, $(\text{NH}_4)_2\text{SO}_4$ , water      | room T.                    | 13    |
| 42  | Topping <i>et al.</i> <sup>80</sup>   | $(\text{NH}_4)_2\text{SO}_4$ , pinonic acid, water          |                            | 7     |
| 43  | Topping <i>et al.</i> <sup>80</sup>   | $(\text{NH}_4)_2\text{SO}_4$ , succinic acid, water         |                            | 5     |
| 44  | Topping <i>et al.</i> <sup>80</sup>   | NaCl, oxalic acid, water                                    |                            | 4     |
| 45  | Tuckermann <sup>81</sup>              | cis-pinonic acid, NaCl, water                               | 20                         | 45    |
| 46  | Tuckermann <sup>81</sup>              | cis-pinonic acid, $\text{MgCl}_2$ , water                   | 20                         | 51    |
| 47  | Tuckermann <sup>81</sup>              | cis-pinonic acid, $\text{AlCl}_3$ , water                   | 20                         | 30    |
| 48  | Tuckermann <sup>81</sup>              | cis-pinonic acid, $\text{NH}_4\text{Cl}$ , water            | 20                         | 20    |
| 49  | Tuckermann <sup>81</sup>              | cis-pinonic acid, $\text{Na}_2\text{SO}_4$ , water          | 20                         | 16    |
| 50  | Tuckermann <sup>81</sup>              | azelaic acid, NaCl, water                                   | 20                         | 7     |
| 51  | Vanhanen <i>et al.</i> <sup>82</sup>  | succinic acid, NaCl, water                                  | 10.3                       | 10    |
| 52  | Vanhanen <i>et al.</i> <sup>82</sup>  | succinic acid, NaCl, water                                  | 15.2                       | 11    |
| 53  | Vanhanen <i>et al.</i> <sup>82</sup>  | succinic acid, NaCl, water                                  | 20.2                       | 14    |
| 54  | Vanhanen <i>et al.</i> <sup>82</sup>  | succinic acid, NaCl, water                                  | 25.15                      | 16    |
| 55  | Vanhanen <i>et al.</i> <sup>82</sup>  | succinic acid, NaCl, water                                  | 30.15                      | 16    |
| 56  | Werner <i>et al.</i> <sup>83</sup>    | succinic acid, $(\text{NH}_4)_2\text{SO}_4$ , water         | 10                         | 18    |

### S3.2 Higher order mixtures

Table S7: Experimental surface tension data of higher order mixtures in the literature: Sources, number of components  $N_c$ , components, category, temperature  $T$ , and number of measured data points  $N_p$ . The categories (cat.) refer to the type of solutes: 1: all salts, 2: all organics, 3: all surfactants, 4: organics + salts, 5: surfactants + salts, 6: surfactants + organics

| No. | Source                                   | $N_c$ | Components                                                                                                           | cat. | $T$ ( $^{\circ}\text{C}$ ) | $N_p$ |
|-----|------------------------------------------|-------|----------------------------------------------------------------------------------------------------------------------|------|----------------------------|-------|
| 1   | Svenningsson <i>et al.</i> <sup>84</sup> | 4     | levoglucosan, succinic acid, fulvic acid, water                                                                      | 2    |                            | 5     |
| 2   | Chen <i>et al.</i> <sup>85</sup>         | 4     | SDS, STS, NaCl, water                                                                                                | 3    | 30-50                      | 13    |
| 3   | Das <i>et al.</i> <sup>17</sup>          | 4     | CPC, DPC, TTAB, water                                                                                                | 3    | 30                         | 11    |
| 4   | Jańczuk <i>et al.</i> <sup>21</sup>      | 4     | FC1, FC2, SDDS, water                                                                                                | 3    | 20                         | 16    |
| 5   | Jańczuk <i>et al.</i> <sup>21</sup>      | 4     | CTAB, TX100, FC1, water                                                                                              | 3    | 20                         | 16    |
| 6   | Jańczuk <i>et al.</i> <sup>86</sup>      | 4     | CTAB, TX100, FC1, water                                                                                              | 3    | 20                         | 32    |
| 7   | Jańczuk <i>et al.</i> <sup>86</sup>      | 4     | CTAB, TX100, FC2, water                                                                                              | 3    | 20                         | 32    |
| 8   | Mulqueen and Blankschtein <sup>23</sup>  | 4     | C12Maltoside, C12Betaine, SDS, water                                                                                 | 3    | 25                         | 10    |
| 9   | Szymczyk and Jańczuk <sup>28</sup>       | 4     | CTAB, TX100, TX165, water                                                                                            | 3    | 20                         | >100  |
| 10  | Szymczyk <i>et al.</i> <sup>30</sup>     | 4     | CTAB, TX-100, TX-114, water                                                                                          | 3    | 20                         | 45    |
| 11  | Szymczyk <i>et al.</i> <sup>87</sup>     | 4     | CTAB, TX165, FC1, water                                                                                              | 3    | 20                         | 25    |
| 12  | Szymczyk <i>et al.</i> <sup>87</sup>     | 4     | CTAB, TX165, FC2, water                                                                                              | 3    | 20                         | 25    |
| 13  | Henning <i>et al.</i> <sup>88</sup>      | 4     | adipic acid, succinic acid, NaCl, water                                                                              | 4    | 0-34                       | 36    |
| 14  | Li <i>et al.</i> <sup>74</sup>           | 4     | formaldehyde, methylglyoxal, $(\text{NH}_4)_2\text{SO}_4$ , water                                                    | 4    |                            | 3     |
| 15  | Li <i>et al.</i> <sup>74</sup>           | 4     | acetaldehyde, methylglyoxal, $(\text{NH}_4)_2\text{SO}_4$ , water                                                    | 4    |                            | 6     |
| 16  | Schwier <i>et al.</i> <sup>89</sup>      | 4     | methylglyoxal, glyoxal, $(\text{NH}_4)_2\text{SO}_4$ , water                                                         | 4    |                            | 30    |
| 17  | Schwier <i>et al.</i> <sup>90</sup>      | 4     | acetaldehyde, $(\text{NH}_4)_2\text{SO}_4$ , leucine, water                                                          | 4    |                            | 7     |
| 18  | Schwier <i>et al.</i> <sup>90</sup>      | 4     | glyoxal, $(\text{NH}_4)_2\text{SO}_4$ , serine, water                                                                | 4    |                            | 5     |
| 19  | Schwier <i>et al.</i> <sup>90</sup>      | 4     | methylglyoxal, $(\text{NH}_4)_2\text{SO}_4$ , leucine, water                                                         | 4    |                            | 6     |
| 20  | Schwier <i>et al.</i> <sup>90</sup>      | 4     | methylglyoxal, $(\text{NH}_4)_2\text{SO}_4$ , acetaldehyde, water                                                    | 4    |                            | 3     |
| 21  | Dar <i>et al.</i> <sup>59</sup>          | 4     | CBr, CBzCl, NaCl, water                                                                                              | 5    | 25                         | >50   |
| 22  | Dar <i>et al.</i> <sup>59</sup>          | 4     | CBr, Brij58, NaCl, water                                                                                             | 5    | 25                         | >50   |
| 23  | Dar <i>et al.</i> <sup>59</sup>          | 4     | CBzCl, Brij58, NaCl, water                                                                                           | 5    | 25                         | >50   |
| 24  | Funasaki and Hada <sup>20</sup>          | 4     | dodecylmethylsulfoxid, CTAB, NaBr, water                                                                             | 5    | 25                         | 39    |
| 25  | Funasaki and Hada <sup>20</sup>          | 4     | dodecylmethylsulfoxid, CTAB, KBr, water                                                                              | 5    | 30                         | 22    |
| 26  | Góralczyk <i>et al.</i> <sup>91</sup>    | 4     | R10PyCl, R5SO3Na, NaCl, water                                                                                        | 5    | 25                         | 30    |
| 27  | Góralczyk <i>et al.</i> <sup>91</sup>    | 4     | R12PyCl, R5SO3Na, NaCl, water                                                                                        | 5    | 25                         | 30    |
| 28  | Góralczyk <i>et al.</i> <sup>91</sup>    | 4     | R10PyCl, R7SO3Na, NaCl, water                                                                                        | 5    | 25                         | 26    |
| 29  | Góralczyk <i>et al.</i> <sup>91</sup>    | 4     | R12PyCl, R7SO3Na, NaCl, water                                                                                        | 5    | 25                         | 21    |
| 30  | Góralczyk <i>et al.</i> <sup>91</sup>    | 4     | R10PyCl, R5SO3Na, NaBr, water                                                                                        | 5    | 25                         | 11    |
| 31  | Góralczyk <i>et al.</i> <sup>91</sup>    | 4     | R10PyCl, R5SO3Na, NaI, water                                                                                         | 5    | 25                         | 10    |
| 32  | Góralczyk <i>et al.</i> <sup>91</sup>    | 4     | R12PyCl, R5SO3Na, NaBr, water                                                                                        | 5    | 25                         | 8     |
| 33  | Góralczyk <i>et al.</i> <sup>91</sup>    | 4     | R12PyCl, R5SO3Na, NaI, water                                                                                         | 5    | 25                         | 8     |
| 34  | Góralczyk <i>et al.</i> <sup>91</sup>    | 4     | R10PyCl, R7SO3Na, NaBr, water                                                                                        | 5    | 25                         | 8     |
| 35  | Góralczyk <i>et al.</i> <sup>91</sup>    | 4     | R10PyCl, R7SO3Na, NaI, water                                                                                         | 5    | 25                         | 8     |
| 36  | Góralczyk <i>et al.</i> <sup>91</sup>    | 4     | R12PyCl, R7SO3Na, NaBr, water                                                                                        | 5    | 25                         | 8     |
| 37  | Góralczyk <i>et al.</i> <sup>91</sup>    | 4     | R12PyCl, R7SO3Na, NaI, water                                                                                         | 5    | 25                         | 6     |
| 38  | Zhang and Zhao <sup>34</sup>             | 4     | C8PyBr, C8SNa, NaBr, water                                                                                           | 5    | 30                         | 30    |
| 39  | Zhang and Zhao <sup>34</sup>             | 4     | C6PyBr, C7FNa, NaBr, water                                                                                           | 5    | 30                         | 18    |
| 40  | Zhang and Zhao <sup>34</sup>             | 4     | C6PyBr, C10SNa, NaBr, water                                                                                          | 5    | 30                         | 16    |
| 41  | Li <i>et al.</i> <sup>74</sup>           | 5     | formaldehyde, acetaldehyde, methylglyoxal, $(\text{NH}_4)_2\text{SO}_4$ , water                                      | 4    |                            | 7     |
| 42  | Schwier <i>et al.</i> <sup>90</sup>      | 5     | formaldehyde, acetaldehyde, methylglyoxal, $(\text{NH}_4)_2\text{SO}_4$ , water                                      | 4    |                            | 3     |
| 43  | Svenningsson <i>et al.</i> <sup>84</sup> | 5     | $(\text{NH}_4)_2\text{SO}_4$ , levoglucosan, succinic acid, fulvic acid, water                                       | 4    |                            | 7     |
| 44  | Svenningsson <i>et al.</i> <sup>84</sup> | 5     | $(\text{NH}_4)_2\text{SO}_4$ , NaCl, succinic acid, fulvic acid, water                                               | 4    |                            | 6     |
| 45  | Dar <i>et al.</i> <sup>59</sup>          | 5     | CBr, CBzCl, Brij58, NaCl, water                                                                                      | 5    | 25                         | >50   |
| 46  | Tuckermann and Cammenga <sup>92</sup>    | 6     | humic acid, azelaic acid, 3-hydroxybutanoic acid, 3-hydroxybenzoic acid, levoglucosan, water                         | 2    | 20                         | 10    |
| 47  | Svenningsson <i>et al.</i> <sup>84</sup> | 6     | $\text{NH}_4\text{NO}_3$ , $(\text{NH}_4)_2\text{SO}_4$ , levoglucosan, succinic acid, fulvic acid, water            | 4    |                            | 6     |
| 48  | Tuckermann and Cammenga <sup>92</sup>    | 7     | humic acid, pinonic acid, azelaic acid, 3-hydroxybutanoic acid, 3-hydroxybenzoic acid, levoglucosan, water           | 2    | 20                         | 10    |
| 49  | Schwier <i>et al.</i> <sup>90</sup>      | 8     | $(\text{NH}_4)_2\text{SO}_4$ , acetaldehyde, formaldehyde, glyoxal, methylglyoxal, oxalic acid, succinic acid, water | 4    |                            | 6     |

## S4 Comparison of the Eberhart and Connors-Wright models

In previous studies, the Connors-Wright model has been found to be slightly more accurate than the Eberhart or Shereshefsky model for the fitting of the surface tension of aqueous solutions of soluble small organic substances<sup>1,6</sup>. Here, we tested if the Connors-Wright model also performs better in reproducing the ternary data of the two systems shown in Section 4.1 in the main paper.

### S4.1 Water–acetonitrile–1,2-ethanediol

Table S8: Fit parameters of the Connors-Wright model<sup>2</sup> for water (1) + acetonitrile (2) + 1,2-ethanediol (3) at 25 °C<sup>50</sup>

|                          | $a_{12}$        | $b_{12}$       | $a_{13}$       | $b_{13}$       | $a_{23}$      | $b_{23}$      |
|--------------------------|-----------------|----------------|----------------|----------------|---------------|---------------|
| Fitted value             | 0.95278         | 0.96922        | 0.83014        | 0.77771        | -0.88234      | -1.6155       |
| 95 % confidence interval | $\pm 0.0077168$ | $\pm 0.042106$ | $\pm 0.005978$ | $\pm 0.011714$ | $\pm 0.69770$ | $\pm 0.34344$ |

In Fig. S2, the performance of the Eberhart model and the Connors-Wright model for the ternary data of this system is shown as well as a direct comparison of the predicted values of the two models (right plot). It can be seen that the Connors-Wright model has a slightly better performance (RMSE = 1.0 mN m<sup>-1</sup>) than the Eberhart model (RMSE = 1.14 mN m<sup>-1</sup>), but the differences are very small (maximum difference of the modelled surface tension between the two models  $\Delta\sigma_{\max} = 0.67$  mN m<sup>-1</sup>). The differences in the prediction of the surface tension of ternary mixtures originate partly from the fit quality of the water-free mixture acetonitrile (2) + 1,2-ethanediol (3) which is shown in Fig. S3. The slightly improved fit quality arises from the presence of an extra fitting parameter in the Connors-Wright model.

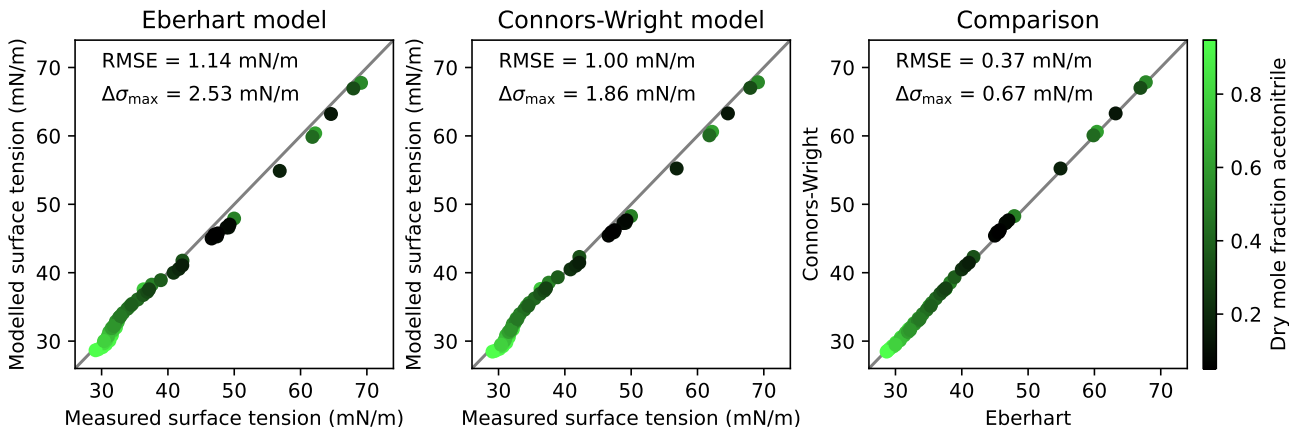

Figure S2: Ternary system water (1) + acetonitrile (2) + 1,2-ethanediol (3): Comparison of the performance of the Eberhart model and the Connors-Wright model.

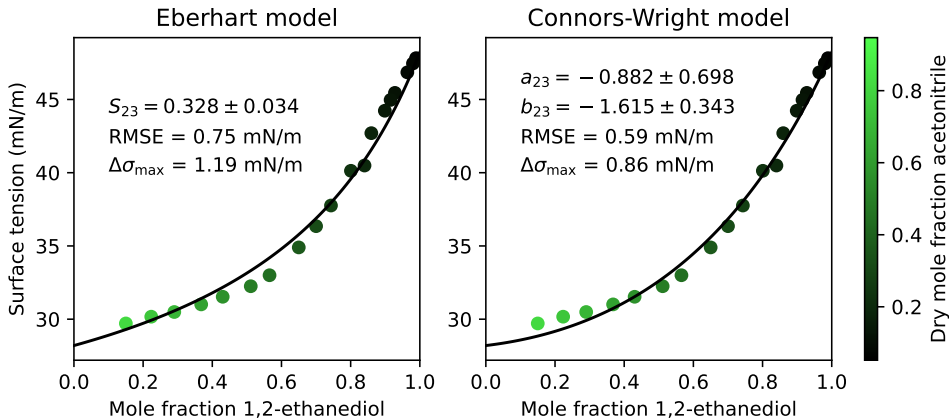

Figure S3: Binary system acetonitrile (2) + 1,2-ethanediol (3)

## S4.2 Water–n-butyl acetate–methanol

Table S9: Fit parameters of the Connors-Wright model<sup>2</sup> for water (1) + n-butyl acetate (2) + methanol (3) at 25 °C<sup>51</sup>

|                          | $a_{12}$      | $b_{12}$        | $a_{13}$        | $b_{13}$      | $a_{23}$     | $b_{23}$     |
|--------------------------|---------------|-----------------|-----------------|---------------|--------------|--------------|
| Fitted value             | 0.9980        | 0.9584          | 0.90565         | 0.751048      | -0.07133     | -1.00715     |
| 95 % confidence interval | $\pm 0.00099$ | $\pm 0.0121597$ | $\pm 0.0043085$ | $\pm 0.01076$ | $\pm 0.3465$ | $\pm 0.1756$ |

In Fig. S4, the performance of the Eberhart model and the Connors-Wright model for the ternary data of this system is shown as well as a direct comparison of the predicted values of the two models (right plot). It can be seen that the Connors-Wright model has a better performance (RMSE = 0.33 mN m<sup>-1</sup>) than the Eberhart model (RMSE = 0.41 mN m<sup>-1</sup>) with a maximum difference of the modelled surface tension between the two models  $\Delta\sigma_{\max} = 0.4 \text{ mN m}^{-1}$ . The differences in the prediction of the surface tension of ternary mixtures originates partly in differences in the fit of the binary mixture water (1) + methanol (3) which is shown in Fig. S5.

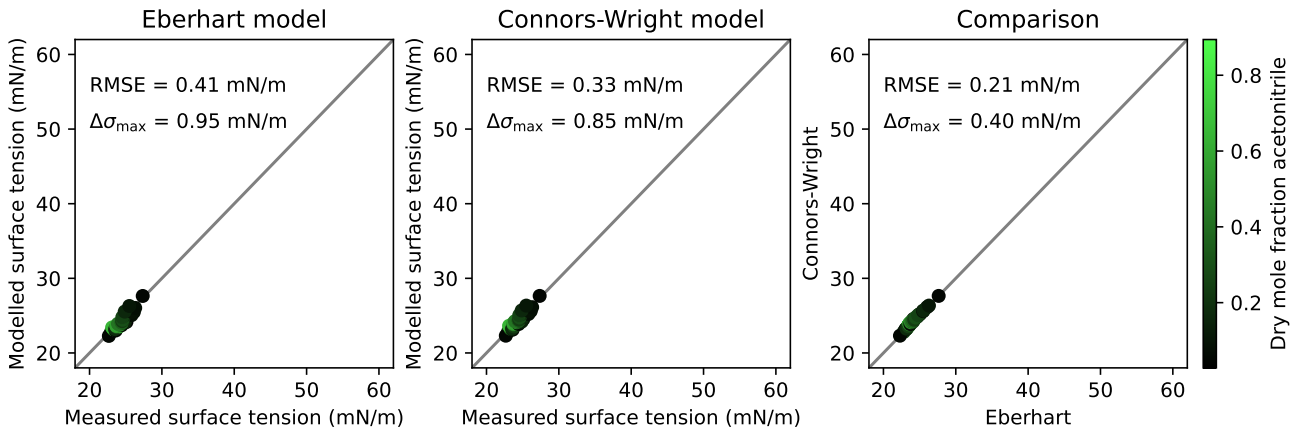

Figure S4: Ternary system water (1) + n-butyl acetate (2) + 1,2-ethanediol (3): Comparison of the performance of the Eberhart model and the Connors-Wright model.

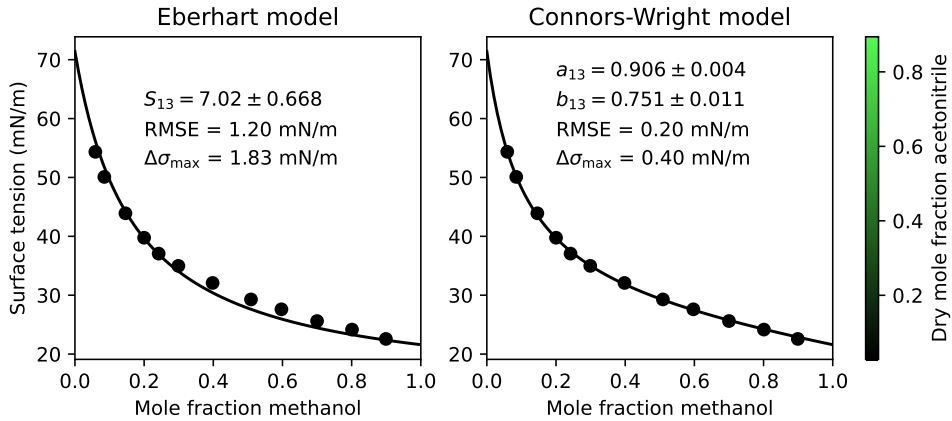

Figure S5: Binary system water (1) + methanol (3)

## S5 Binary Eberhart model fits

### S5.1 Binary fits for water–organic–organic systems

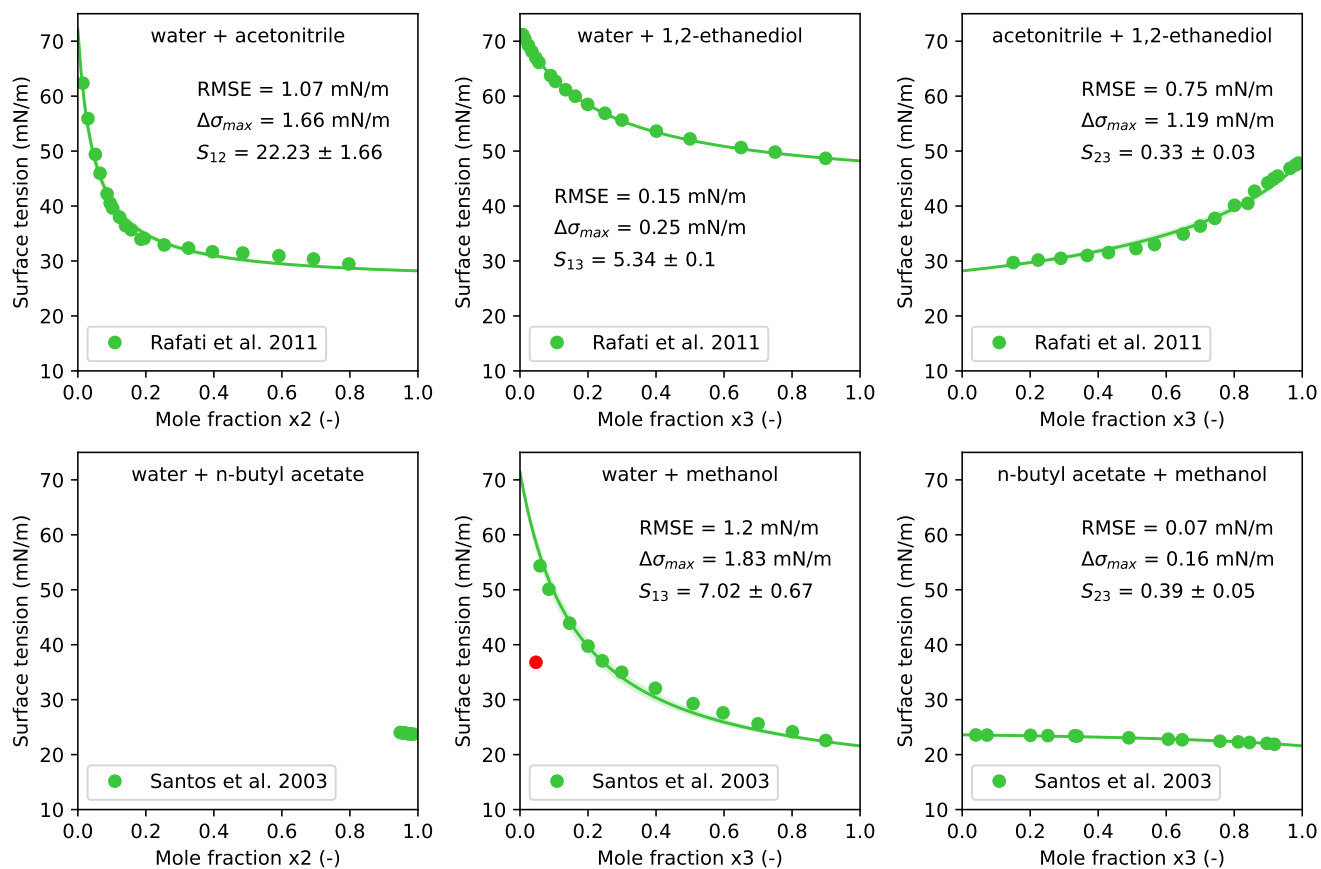

Figure S6: Binary fits with the Eberhart model for the ternary systems water (1) + acetonitrile (2) + 1,2-ethanediol (3) from Rafati *et al.*<sup>50</sup> and water (1) + n-butyl acetate (2) + methanol (3) from Santos *et al.*<sup>51</sup>. Light green shading shows the 95% confidence interval of the fit. No fit was made for the binary system water + n-butyl acetate due to the little coverage of the data space by the measurements because of the miscibility gap of this system. The red data point in the water + methanol plot was considered an outlier and therefore not included for the fitting.

## S5.2 Binary fits for water–surfactant–surfactant systems

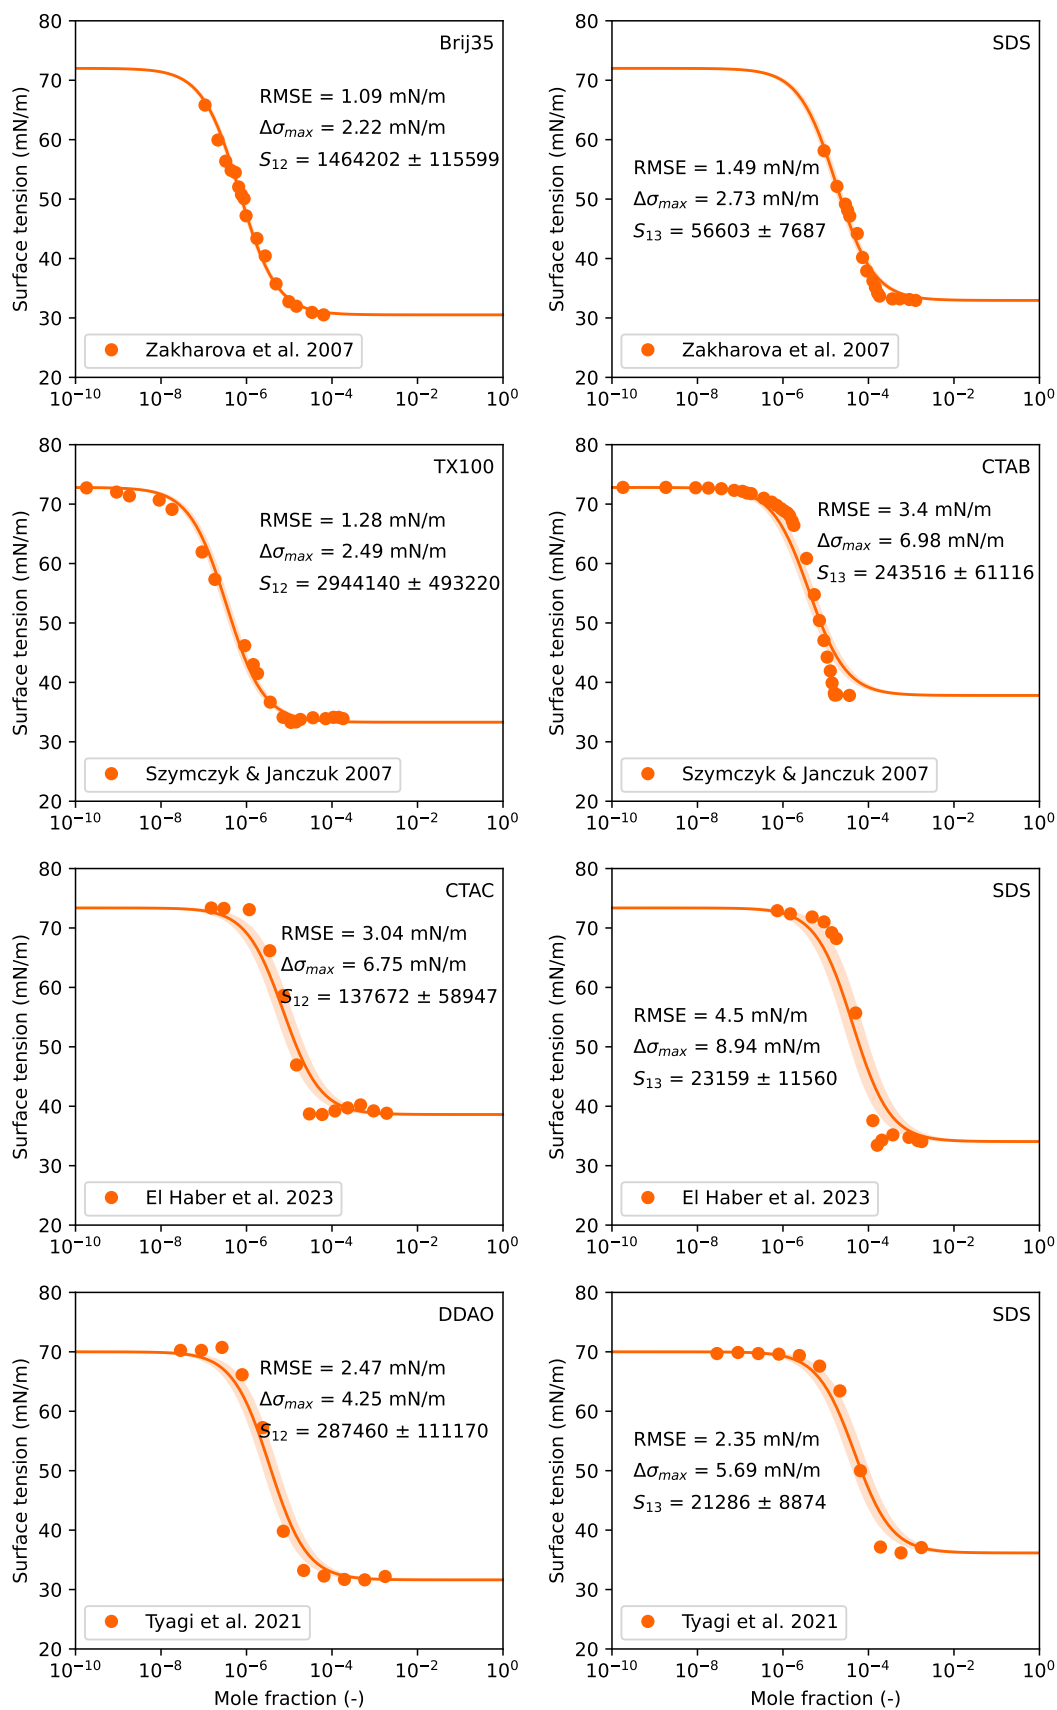

Figure S7: Binary fits with the Eberhart model for the water–surfactant–surfactant systems. Light orange shading shows the 95% confidence interval.

### S5.3 Binary fits for water–organic–salt systems

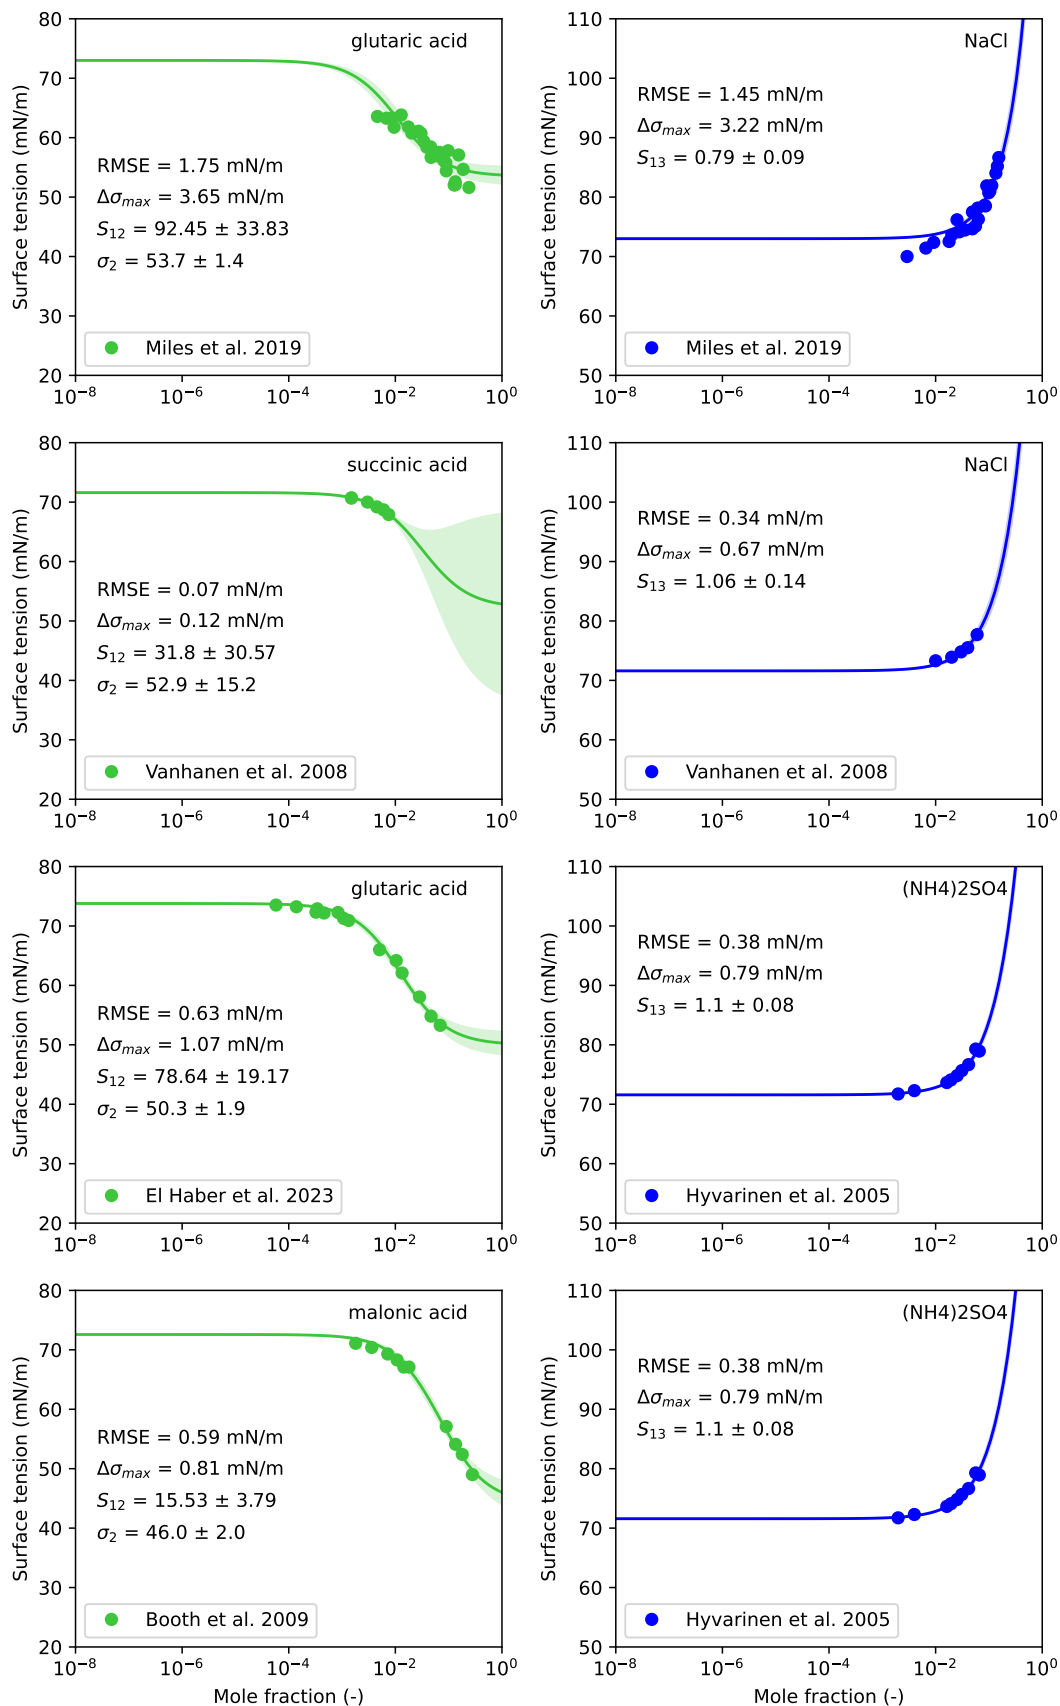

Figure S8: Binary fits with the Eberhart model for the water–organic–salt systems. Light green and blue shading shows the 95% confidence interval.

## S5.4 Binary fits for water–surfactant–salt systems

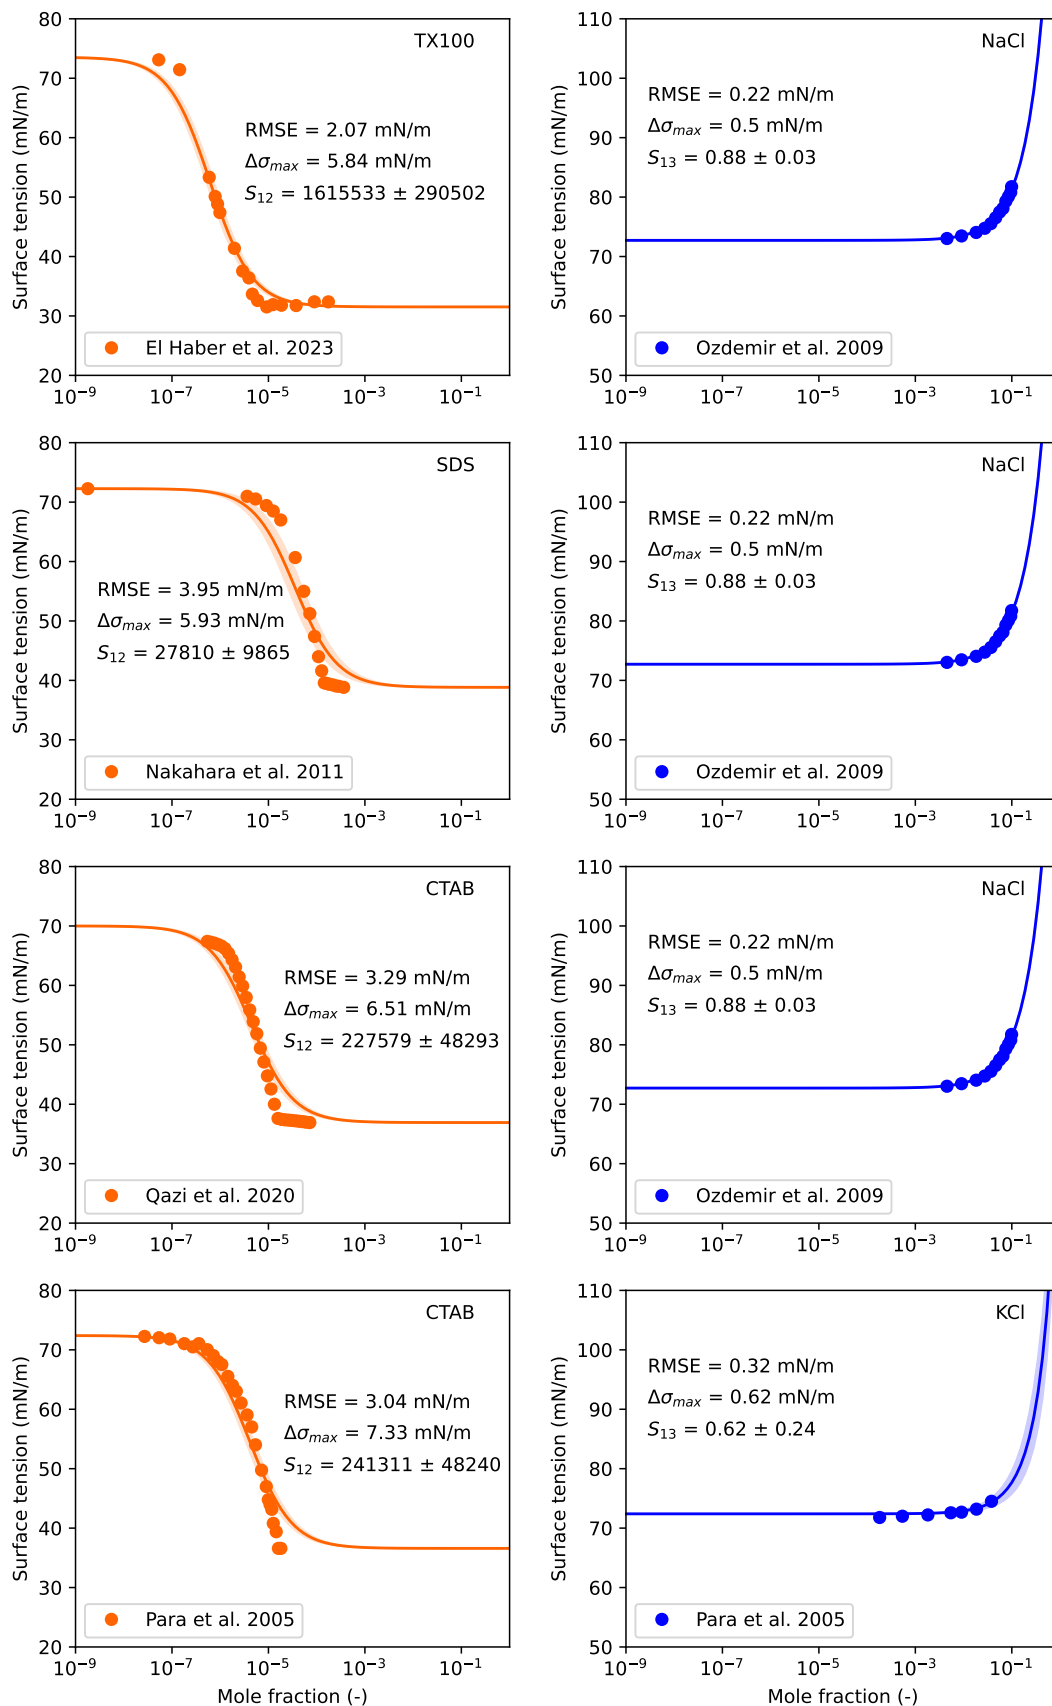

Figure S9: Binary fits with the Eberhart model for the water–surfactant–salt systems. Light orange and blue shading shows the 95% confidence interval.



## S5.5 Binary fits for water–surfactant–organic systems

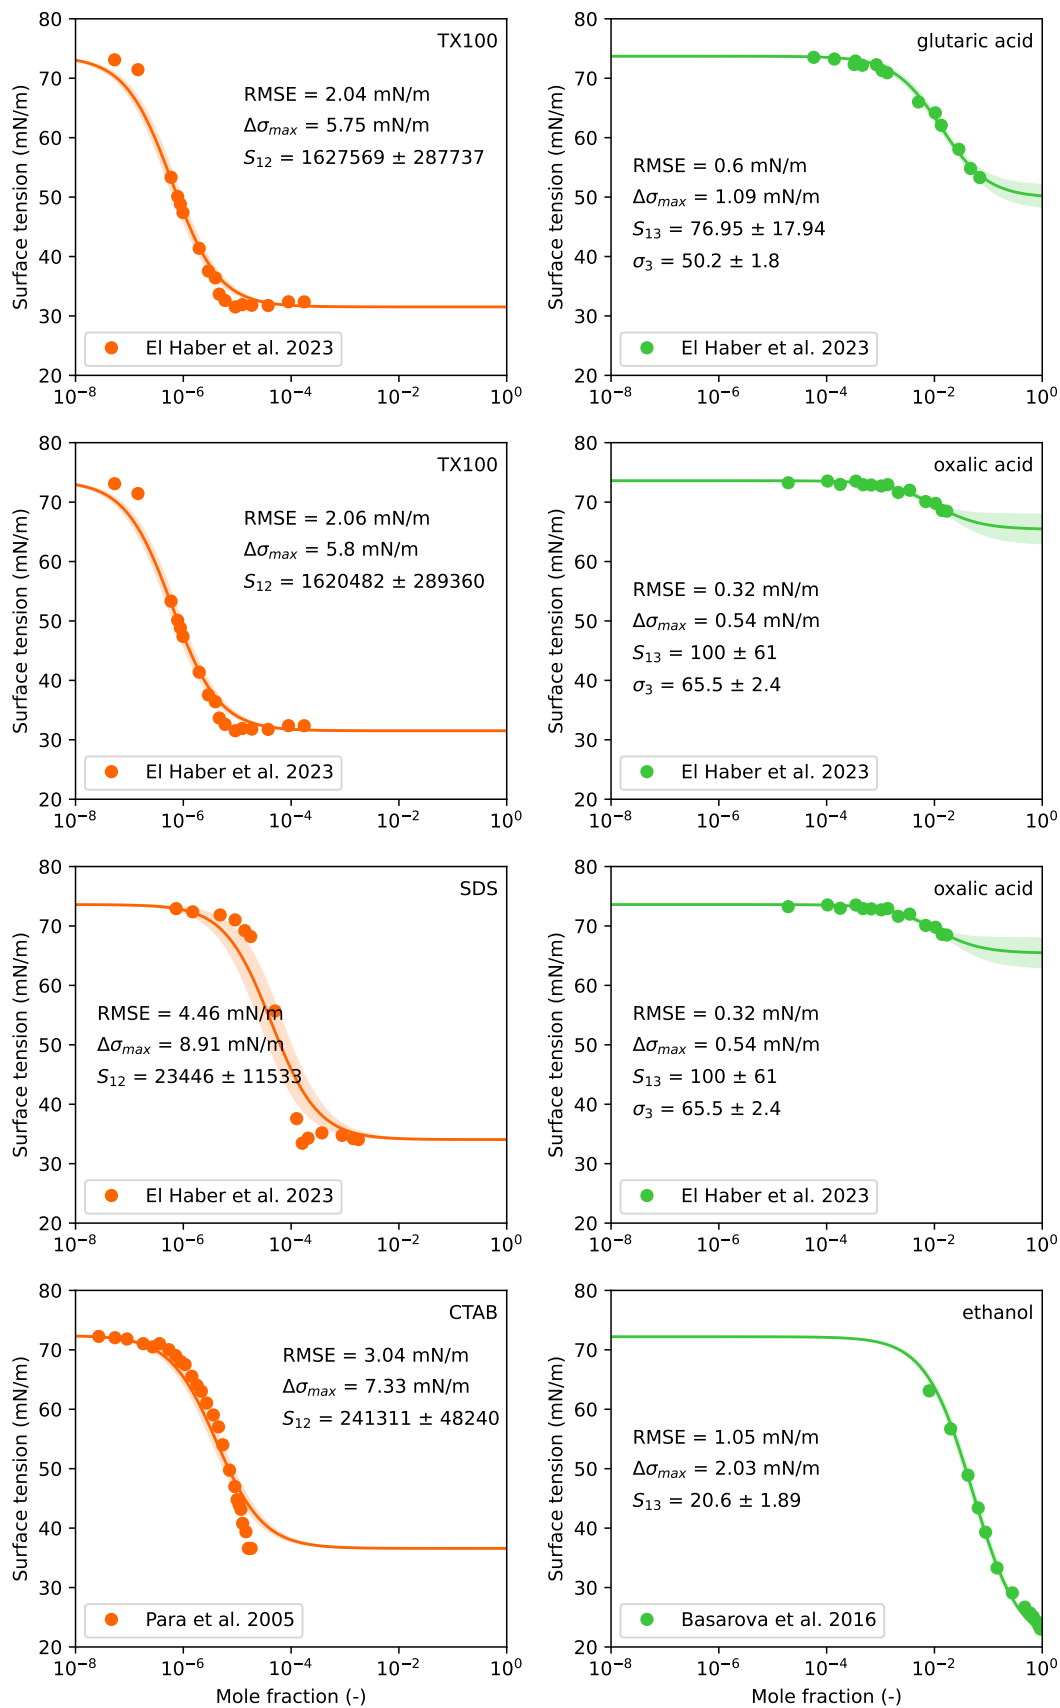

Figure S10: Binary fits with the Eberhart model for the water–surfactant–organic systems. Light orange and green shading shows the 95% confidence interval.

## S5.6 Binary fits for a quaternary system

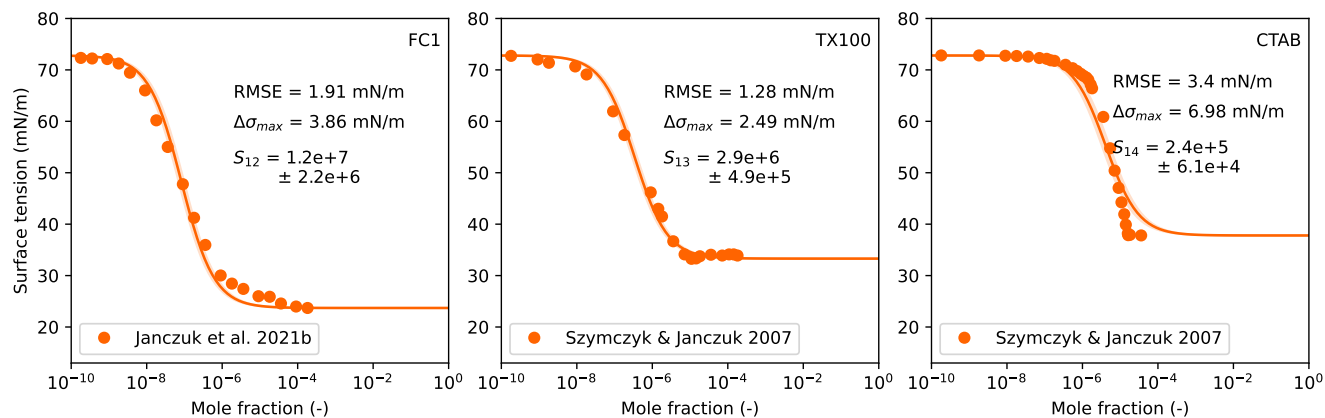

Figure S11: Binary fits with the Eberhart model for the quaternary system containing three surfactants. Light orange shading shows the 95% confidence interval.

## S6 Additional tables and figures for ternary systems

### S6.1 Ternary system properties tables

Table S10: Temperature ( $T$ ), number of ternary datapoints ( $n_p$ ), and measurement method of the ternary systems and the source data format. For data provided as figures in the original source, data was obtained with the help from digitisation software

| System                                                                 | Reference | $T$<br>°C | $n_p$ | method                                      | source |
|------------------------------------------------------------------------|-----------|-----------|-------|---------------------------------------------|--------|
| water (1) +                                                            |           |           |       |                                             |        |
| acetonitrile (2)+ 1,2-ethanediol (3)                                   | 50        | 25        | 52    | du Noüy ring                                | table  |
| n-butyl acetate (2)+ methanol (3)                                      | 51        | 30        | 48    | du Noüy ring                                | table  |
| Brij35 (2)+ SDS (3)                                                    | 33        | 25        | 60    | du Noüy ring                                | figure |
| TX100 (2)+ CTAB (3)                                                    | 26        | 19        | 55    | du Noüy ring                                | figure |
| CTAC (2)+ SDS (3)                                                      | 18        | 24        | 41    | pendant drop                                | table  |
| DDAO (2)+ SDS (3)                                                      | 32        | 25        | 53    | pendant drop                                | figure |
| TX114 (2)+ SDS (3)                                                     | 18        | 24        | 73    | pendant drop                                | table  |
| glutaric acid (2)+ NaCl (3)                                            | 75        | 25        | 30    | microdroplet dispenser<br>+ optical tweezer | figure |
| succinic acid (2)+ NaCl (3)                                            | 82        | 25        | 16    | capillary rise                              | table  |
| glutaric acid (2)+ (NH <sub>4</sub> ) <sub>2</sub> SO <sub>4</sub> (3) | 18        | 24        | 22    | pendant drop                                | table  |
| malonic acid (2)+ (NH <sub>4</sub> ) <sub>2</sub> SO <sub>4</sub> (3)  | 68        | 21        | 16    | pendant drop                                | table  |
| TX100 (2)+ NaCl (3)                                                    | 18        | 24        | 60    | pendant drop                                | table  |
| SDS (2)+ NaCl (3)                                                      | 62        | 25        | 100   | drop volume method                          | figure |
| CTAB (2)+ NaCl (3)                                                     | 64        | 21        | 453   | du Noüy ring                                | table  |
| CTAB (2)+ KCl (3)                                                      | 63        | 21        | 149   | pendant drop                                | figure |
| TX100 (2)+ (NH <sub>4</sub> ) <sub>2</sub> SO <sub>4</sub> (3)         | 18        | 24        | 33    | pendant drop                                | table  |
| TX100 (2)+ glutaric acid (3)                                           | 18        | 24        | 101   | pendant drop                                | table  |
| TX100 (2)+ oxalic acid (3)                                             | 18        | 24        | 63    | pendant drop                                | table  |
| SDS (2)+ oxalic acid (3)                                               | 18        | 24        | 45    | pendant drop                                | table  |
| CTAB (2)+ ethanol (3)                                                  | 53        | 19        | 243   | du Noüy ring                                | figure |
| Brij35 (2)+ glutaric acid (3)                                          | 18        | 24        | 80    | pendant drop                                | table  |

Table S11: Molar mass ( $\tilde{M}$ ) and density ( $\rho$ ) used for conversion of molar concentration or mass fraction to mole fractions for the ternary systems where needed

| System                                                                 | $\tilde{M}_1$<br>g mol <sup>-1</sup> | $\tilde{M}_2$<br>g mol <sup>-1</sup> | $\tilde{M}_3$<br>g mol <sup>-1</sup> | $\rho_1$<br>kg L <sup>-1</sup> | $\rho_2$<br>kg L <sup>-1</sup> | $\rho_3$<br>kg L <sup>-1</sup> |
|------------------------------------------------------------------------|--------------------------------------|--------------------------------------|--------------------------------------|--------------------------------|--------------------------------|--------------------------------|
| water (1) +                                                            |                                      |                                      |                                      |                                |                                |                                |
| glutaric acid (2)+ NaCl (3)                                            |                                      | 132.12                               | 58.44                                |                                |                                |                                |
| succinic acid (2)+ NaCl (3)                                            |                                      | 118.09                               | 58.44                                |                                |                                |                                |
| glutaric acid (2)+ (NH <sub>4</sub> ) <sub>2</sub> SO <sub>4</sub> (3) | 18.00                                | 132.12                               | 132.14                               | 1.00                           | 1.43                           | 1.77                           |
| TX100 (2)+ NaCl (3)                                                    | 18.00                                | 625.00                               | 58.44                                | 1.00                           | 1.06                           | 2.16                           |
| SDS (2)+ NaCl (3)                                                      | 18.00                                | 288.38                               | 58.44                                | 1.00                           | 1.01                           | 2.16                           |
| CTAB (2)+ NaCl (3)                                                     | 18.00                                | 364.45                               | 58.44                                | 1.00                           | 1.23                           | 2.16                           |
| CTAB (2)+ KCl (3)                                                      | 18.00                                | 364.45                               | 74.55                                | 0.99                           | 1.23                           | 1.98                           |
| TX100 (2)+ (NH <sub>4</sub> ) <sub>2</sub> SO <sub>4</sub> (3)         | 18.00                                | 625.00                               | 132.14                               | 1.00                           | 1.06                           | 1.77                           |
| TX100 (2)+ glutaric acid (3)                                           | 18.00                                | 625.00                               | 132.12                               | 1.00                           | 1.06                           | 1.43                           |
| TX100 (2)+ oxalic acid (3)                                             | 18.00                                | 625.00                               | 90.03                                | 1.00                           | 1.06                           | 1.90                           |
| SDS (2)+ oxalic acid (3)                                               | 18.00                                | 288.38                               | 90.03                                | 1.00                           | 1.01                           | 1.90                           |
| CTAB (2)+ ethanol (3)                                                  | 18.00                                | 364.45                               | 46.07                                | 1.00                           | 1.23                           | 0.79                           |
| Brij35 (2)+ glutaric acid (3)                                          | 18.00                                | 1199.54                              | 132.12                               | 1.00                           | 1.05                           | 1.43                           |
| CTAC (2)+ oxalic acid (3)                                              | 18.00                                | 320.00                               | 90.03                                | 1.00                           | 0.97                           | 1.90                           |

## S6.2 Water–surfactant–surfactant

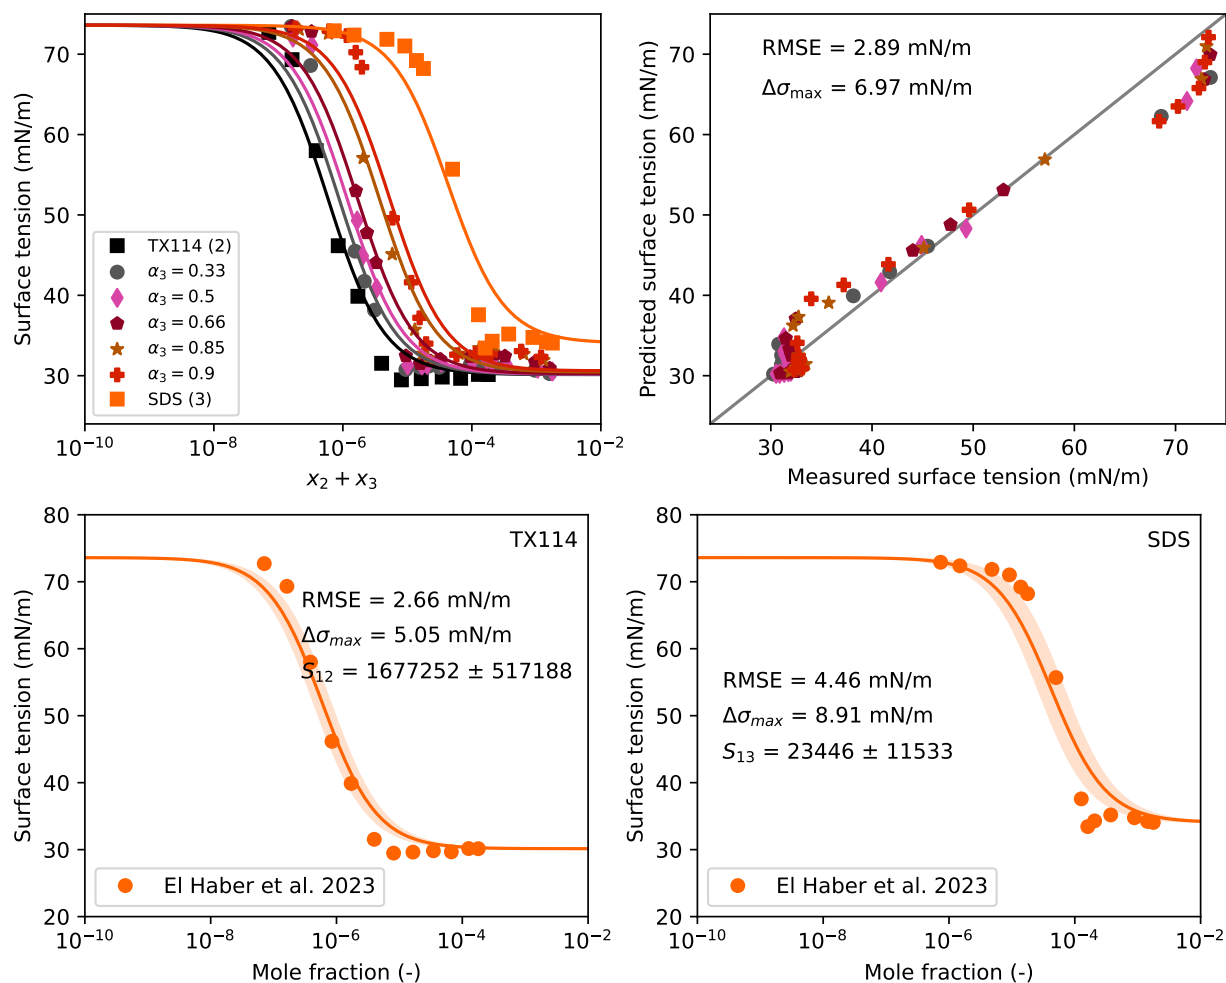

Figure S12: Surface tension of the system water (1) + TX114 (2) + SDS (3). The upper left panel shows experimental data from El Haber *et al.*<sup>18</sup> at  $T = 24^\circ\text{C}$  (symbols) and model results (solid lines) from Equations 4 and 8. The upper right panel shows the error in predicted surface tension for all ternary data points. The dry mole fraction  $\alpha_3$  is defined as  $x_3/(x_2 + x_3)$ . The lower panels show the binary water–surfactant fits. Light orange shading shows the 95% confidence interval.

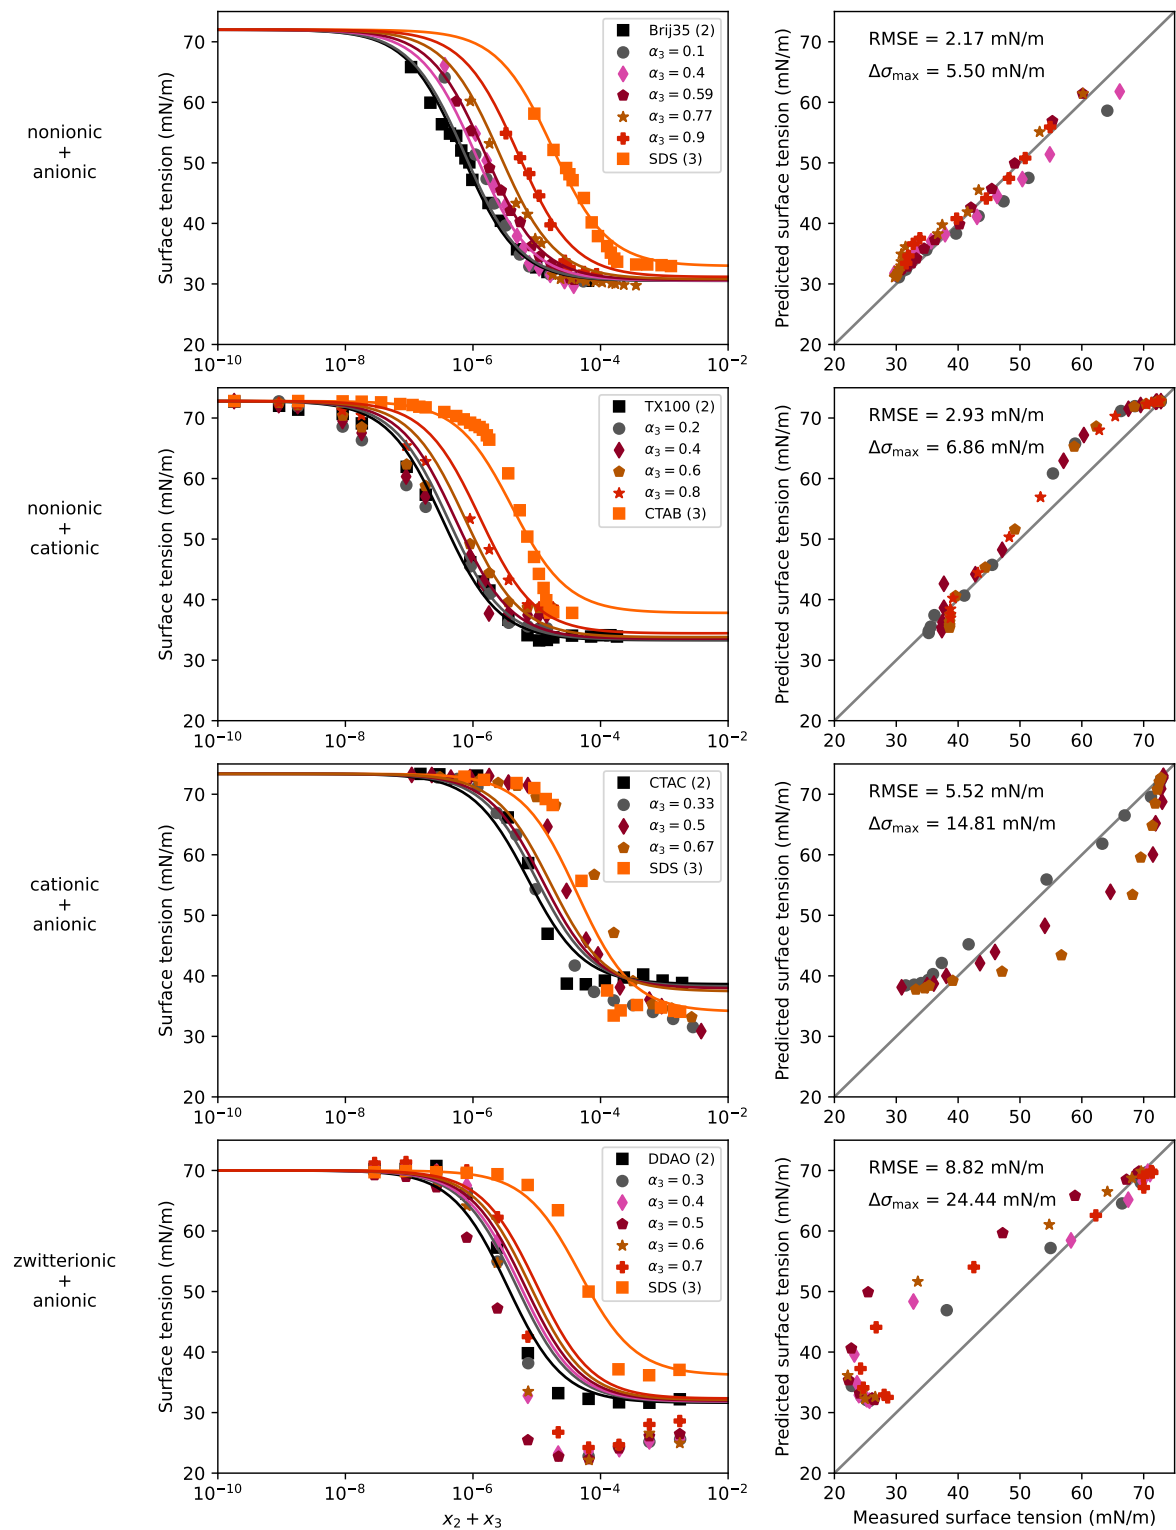

Figure S13: Same as Fig. 4 in the main paper but using the model in its fully predictive form (Equation 8,  $A_{23} = 0$ ,  $B_{23} = 0$ ,  $S_{23} = 1$ ).

### S6.3 Water–organic–salt

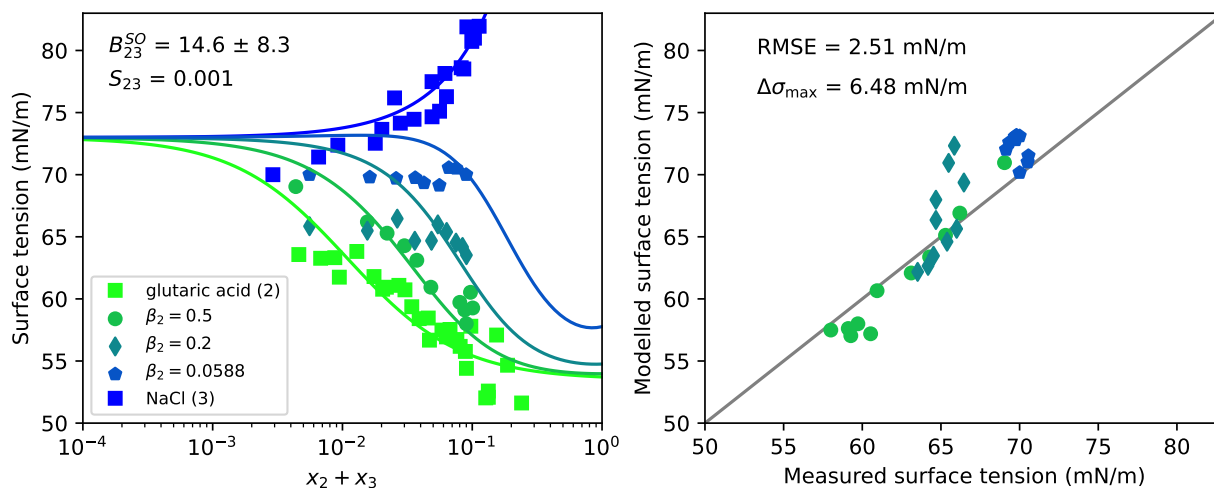

Figure S14: Surface tension of the system water (1) + glutaric acid (2) + NaCl (3) with  $S_{23} = 1 \times 10^{-3}$ . The left panel shows experimental data from Miles *et al.*<sup>75</sup> at  $T = 25^\circ\text{C}$  (symbols) and model results (solid lines) from Equations 4, 8 and 9. The upper right panel shows the error in predicted surface tension for all ternary data points. The dry mass fraction  $\beta_2$  is defined as  $m_2/(m_2 + m_3)$  where  $m$  is the mass.

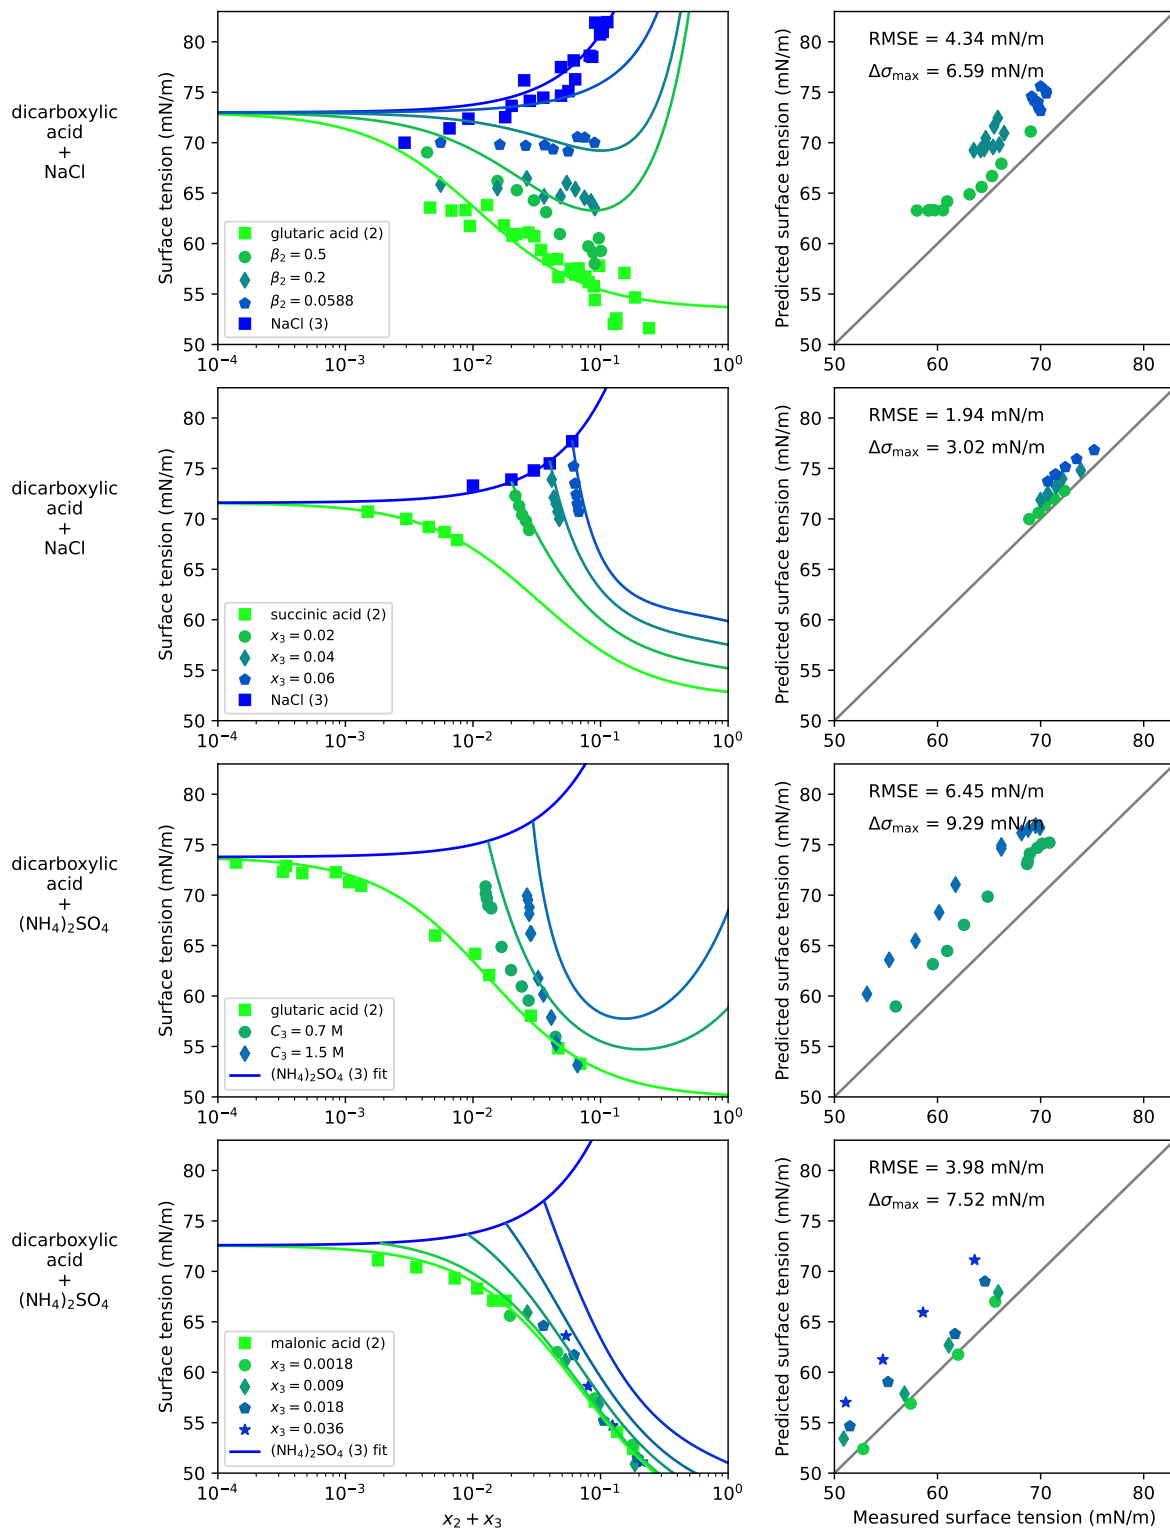

Figure S15: Same plot as Fig. 5 but without the salting-out factor ( $F_{23} = 0$ ).

## S6.4 Water–surfactant–salt

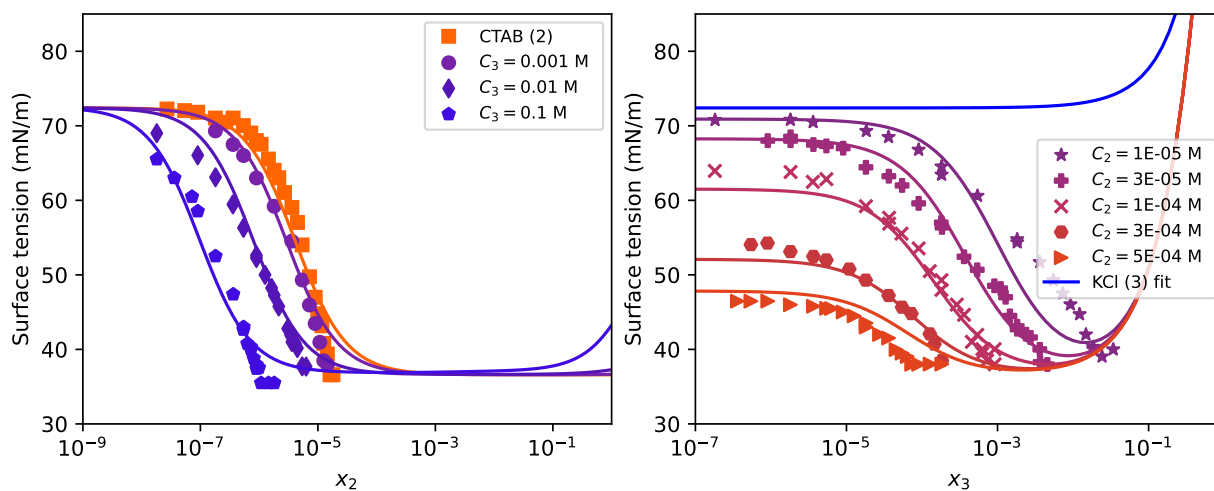

Figure S16: Surface tension of the system water (1) + CTAB (2) + KCl (3) shown on two different x-axes. Symbols show experimental data from Para *et al.*<sup>63</sup> at  $T = 22^\circ\text{C}$  and lines show model results from Equations 4, 8 and 9.  $C_i$  is the molar concentration of substance  $i$  in  $\text{molL}_{\text{solution}}^{-1}$  (M).

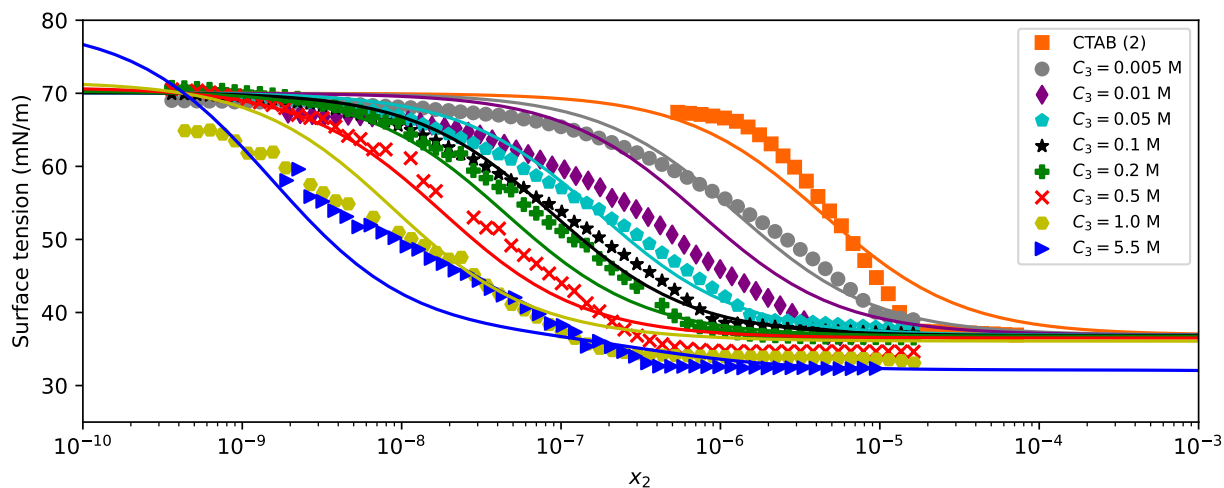

Figure S17: Same plot as in the third panel of the left column in Fig. 6 with different colors.



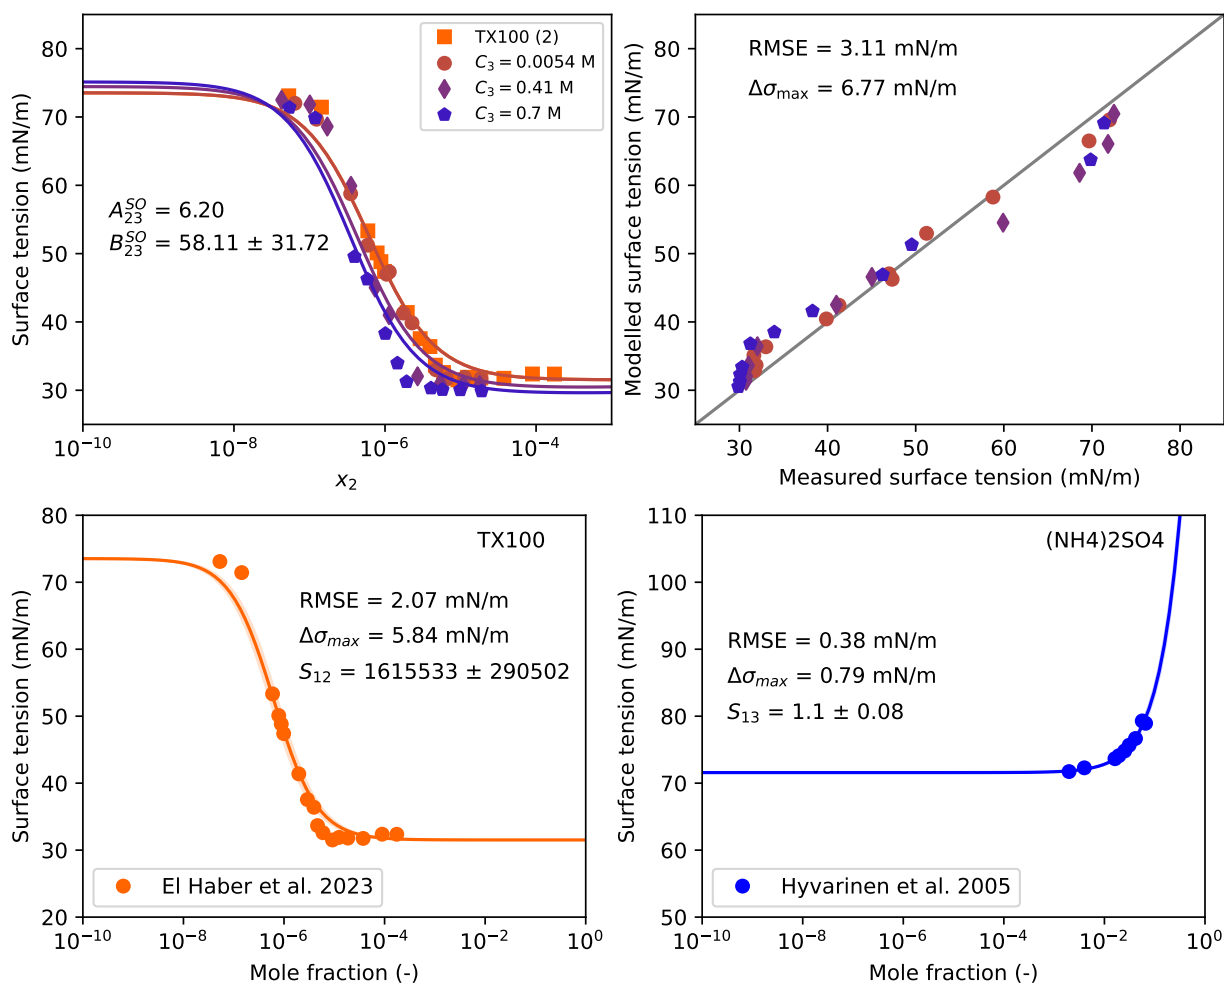

Figure S18: Surface tension of the system water (1) + TX100 (2) +  $(\text{NH}_4)_2\text{SO}_4$  (3). The upper left panel shows experimental data from El Haber *et al.*<sup>18</sup> at  $T = 24^\circ\text{C}$  (symbols) and model results (solid lines) from Equations 4, 8, and 9. The upper right panel shows the error in predicted surface tension for all ternary data points.  $C_3$  is the molar concentration of substance (3) in  $\text{molL}_{\text{solution}}^{-1}$  (M). The lower panels show the binary water–surfactant fits. Light orange and blue shading shows the 95% confidence interval.

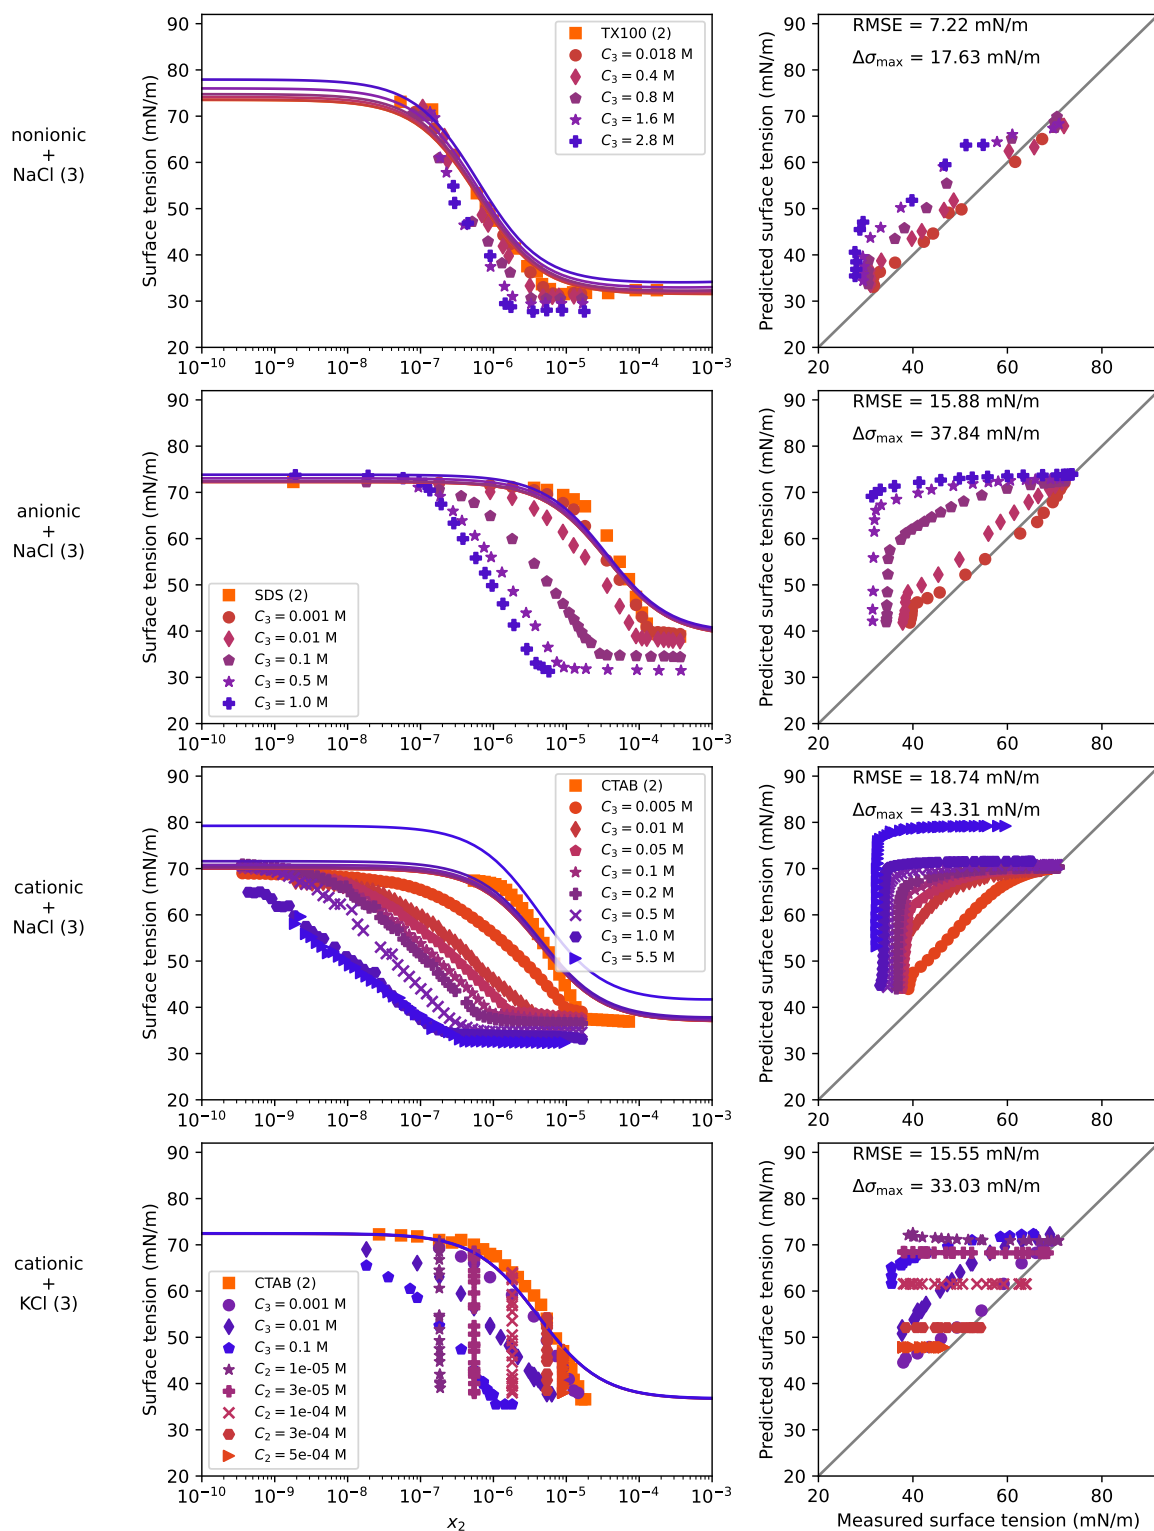

Figure S19: Same as Fig. 6 but using the model in its fully predictive form (Equation 8,  $A_{23} = 0$ ,  $B_{23} = 0$ ,  $S_{23} = 1$ ).

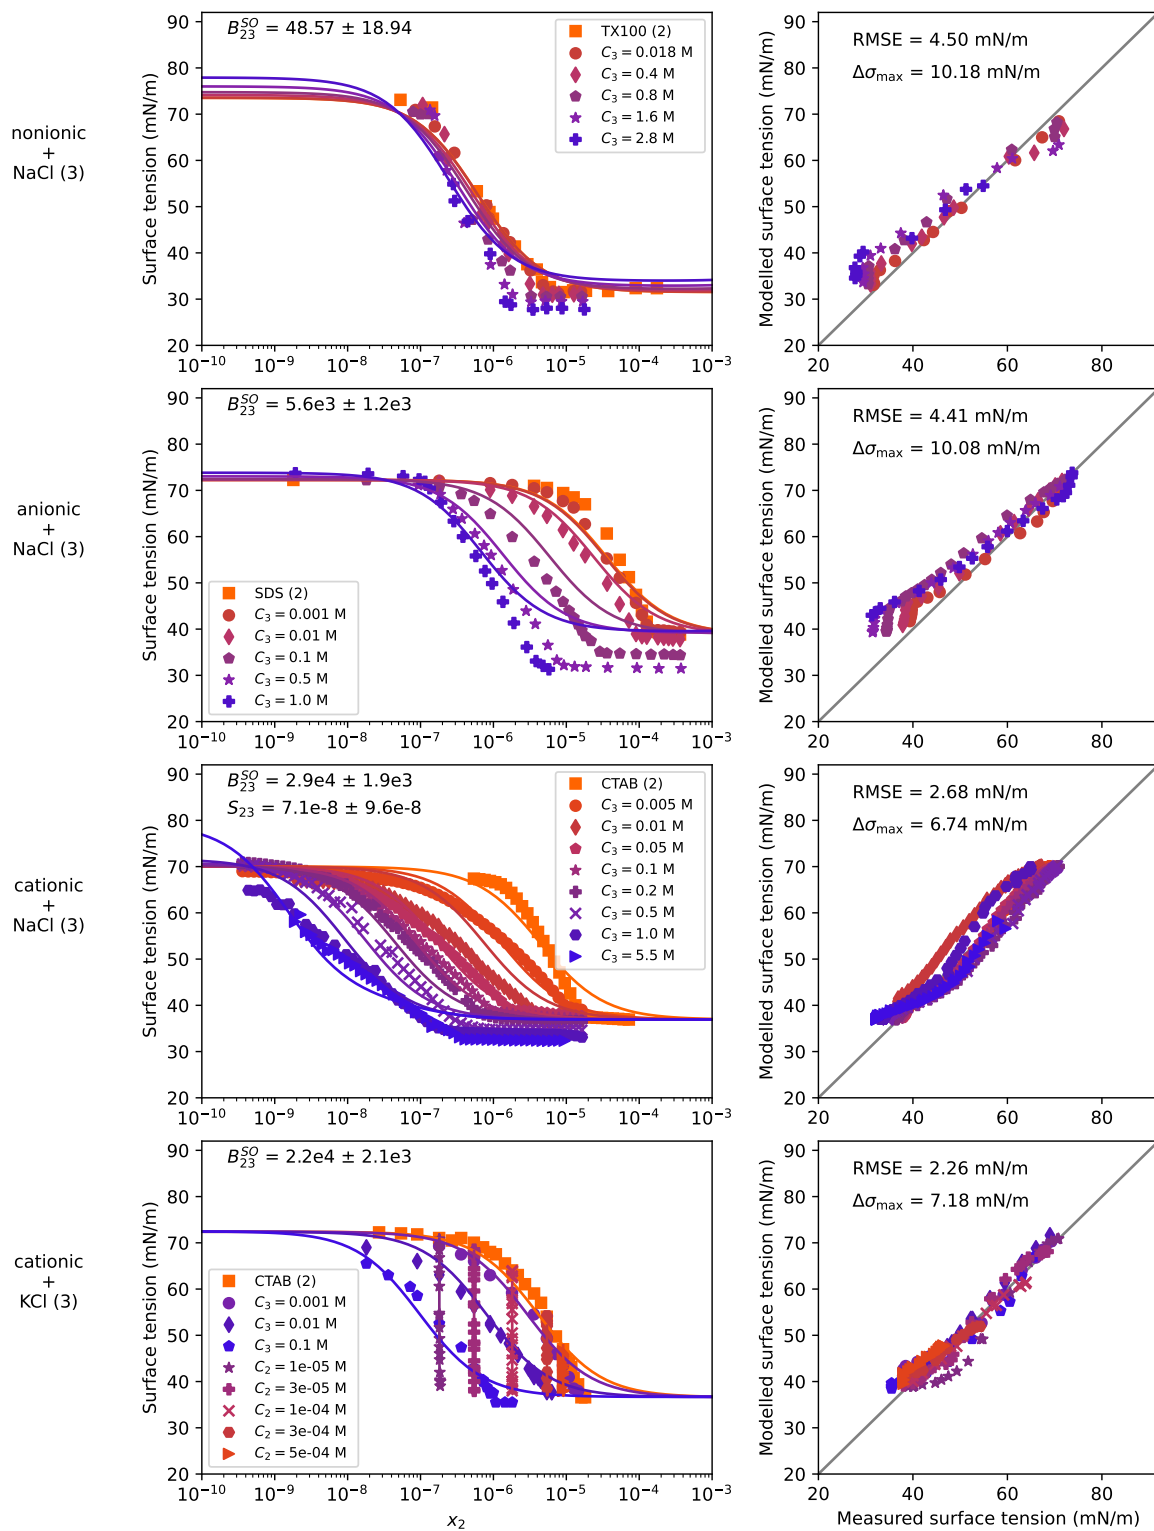

Figure S20: Same as Fig. 6 but without surface non-ideality ( $A_{23} = 0$ ).

## S6.5 Water–surfactant–organic

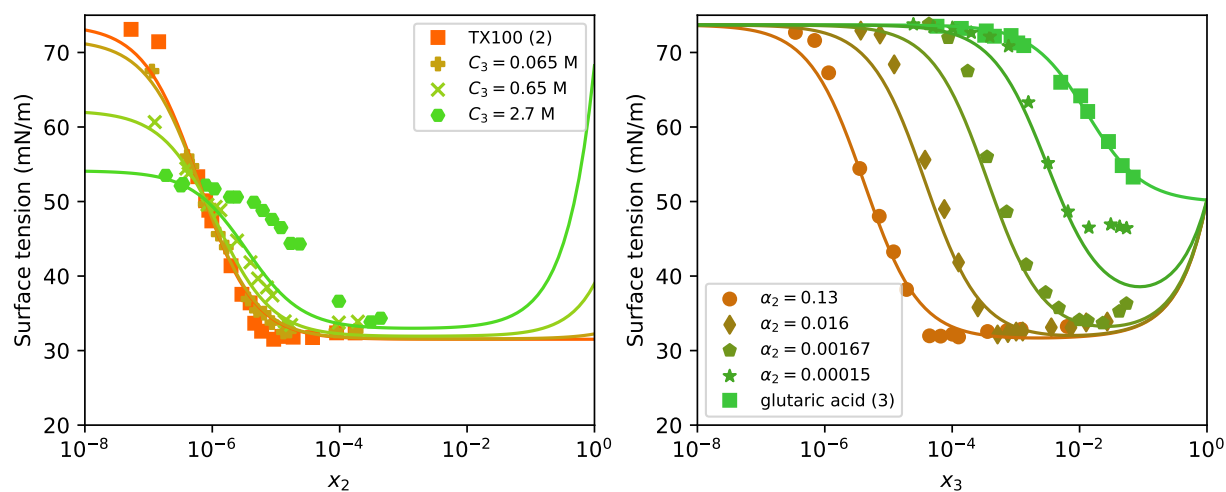

Figure S21: Surface tension of the system water (1) + TX100 (2) + glutaric acid (3) shown on two different x-axes. Symbols show experimental data from El Haber *et al.*<sup>18</sup> at  $T = 24^\circ\text{C}$  and lines show model results from Equations 4 and 8. The dry mole fraction  $\alpha_2$  is defined as  $x_2/(x_2 + x_3)$ .  $C_3$  is the molar concentration of substance (3) in  $\text{molL}_{\text{solution}}^{-1}$  (M).

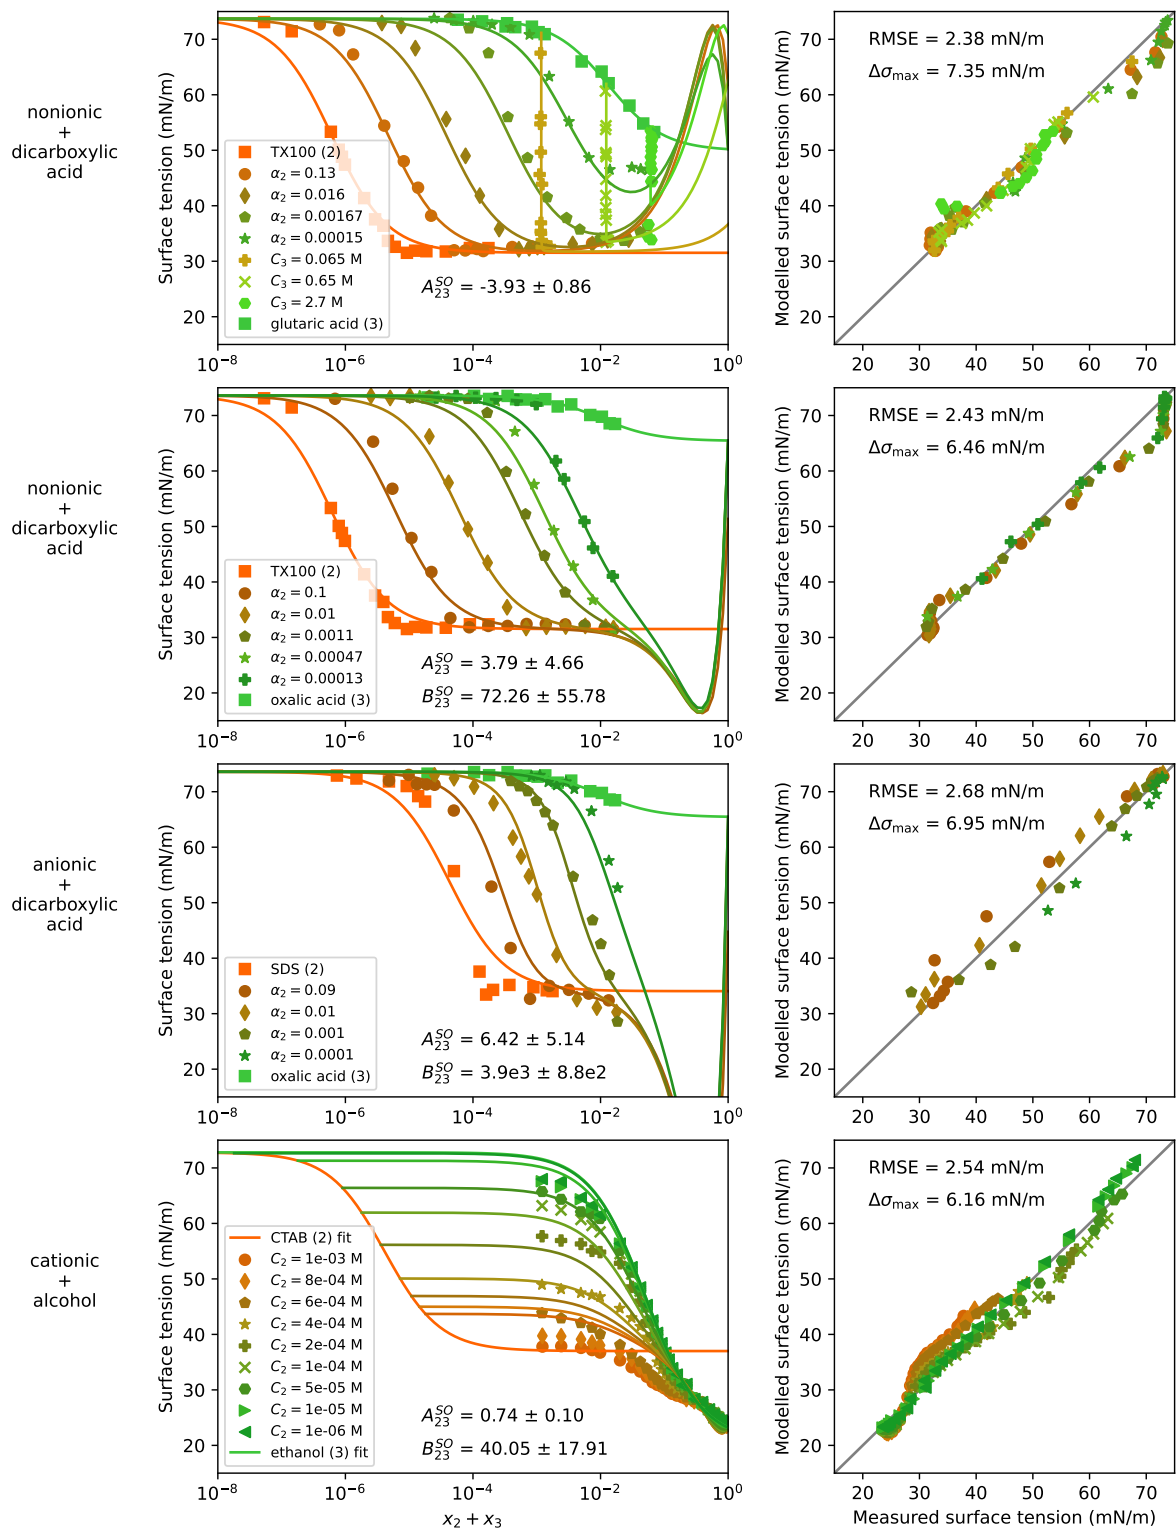

Figure S22: Same as Fig. 7 but with bulk and surface non-ideality effects included (Equations 9 and 10).

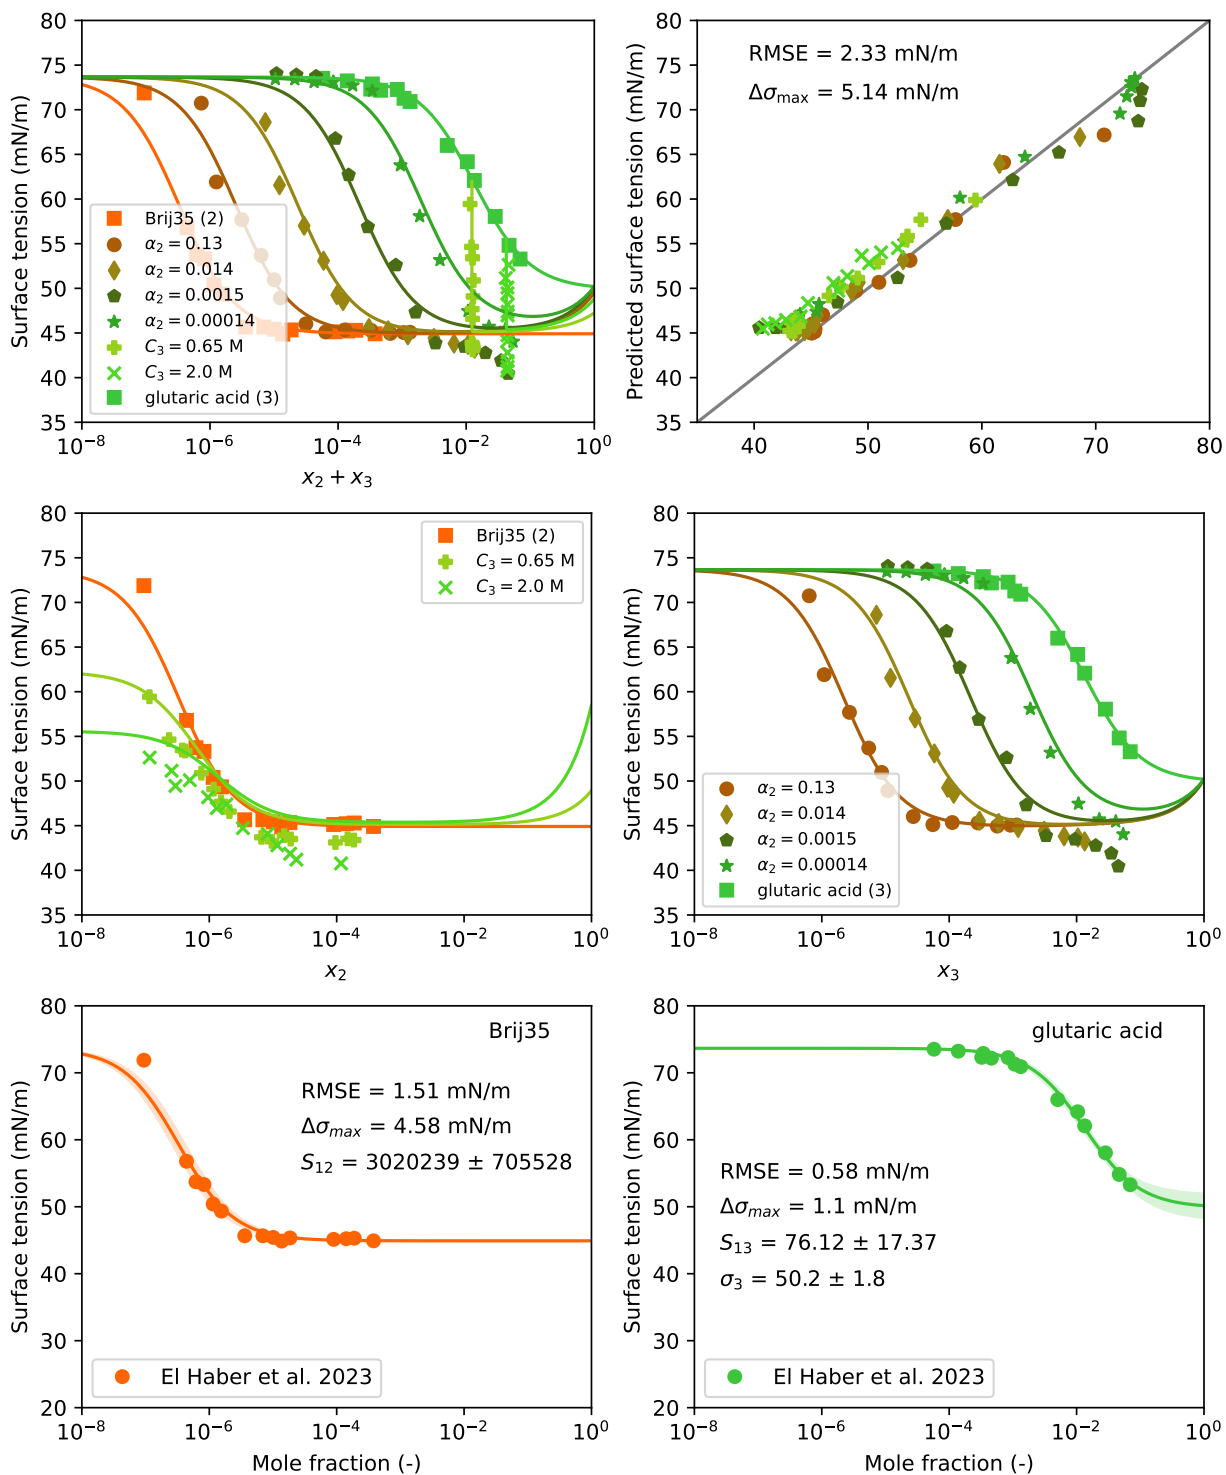

Figure S23: Surface tension of the system water (1) + Brij35 (2) + glutaric acid (3) shown on three different x-axes, the error in prediction (upper right panel) and the binary water–solute fits (lowest row). Symbols show experimental data from El Haber *et al.*<sup>18</sup> at  $T = 24^\circ\text{C}$  and lines show model results from Equations 4 and 8. The dry mole fraction  $\alpha_2$  is defined as  $x_2/(x_2 + x_3)$ .  $C_3$  is the molar concentration of substance (3) in  $\text{molL}_{\text{solution}}^{-1}$  (M).

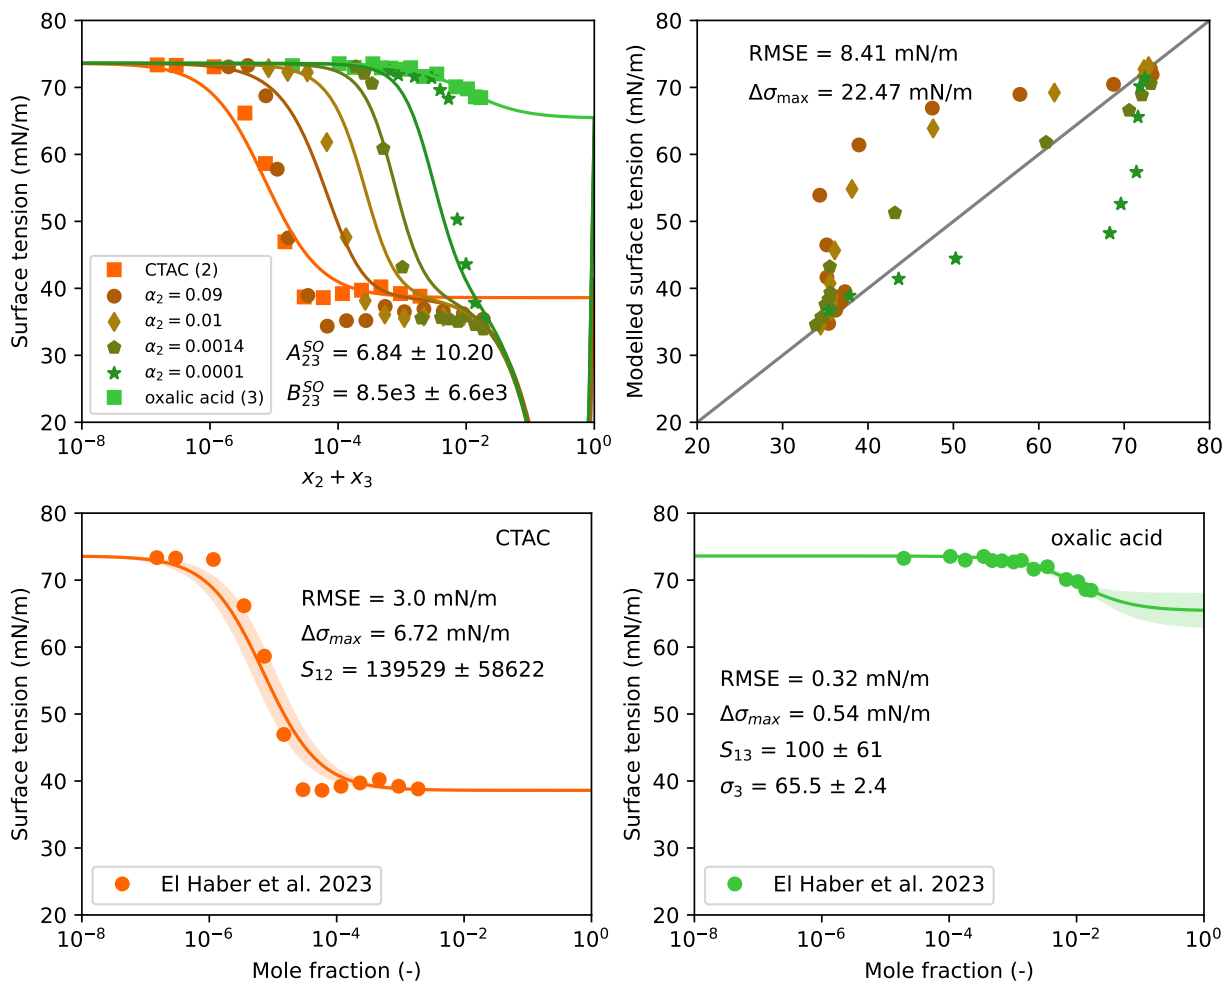

Figure S24: Surface tension of the system water (1) + CTAC (2) + oxalic acid (3) and the binary water-solute fits (bottom row). Symbols show experimental data from El Haber *et al.*<sup>18</sup> at  $T = 24^\circ\text{C}$  and lines show model results from Equations 4, 8, 9, and 10. The dry mole fraction  $\alpha_2$  is defined as  $x_2/(x_2 + x_3)$ .  $C_3$  is the molar concentration of substance (3) in  $\text{molL}_{\text{solution}}^{-1}$  (M).

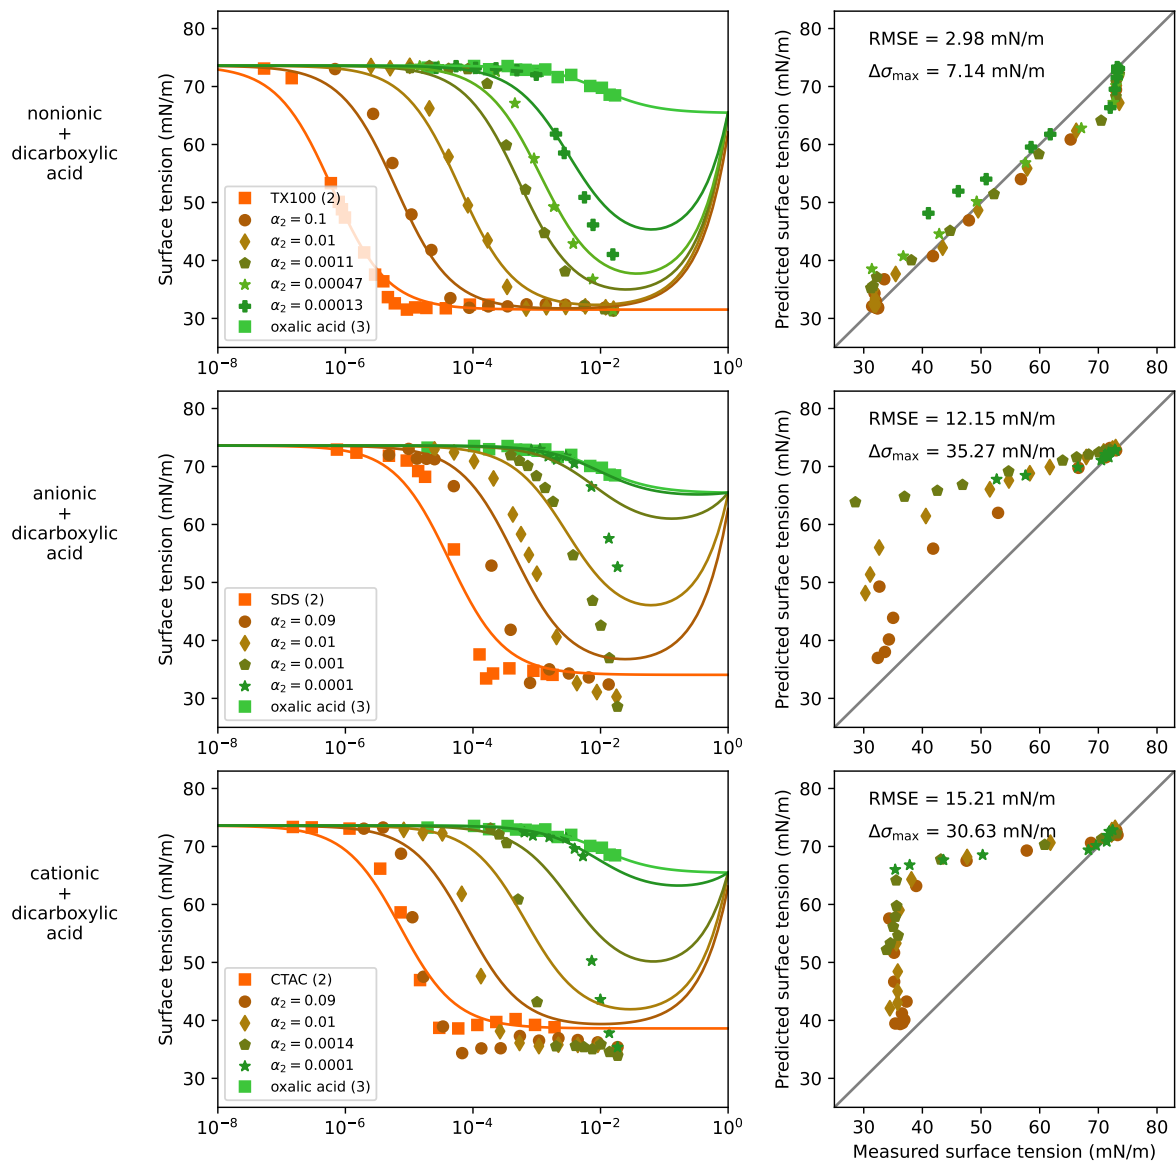

Figure S25: Same as the second and third row in Fig. 7 and the first row in Fig. S24 but using the model in its fully predictive form (Equation 8,  $A_{23} = 0$ ,  $B_{23} = 0$ ,  $S_{23} = 1$ ).



## References

- 1 J. Kleinheins, N. Shardt, M. El Haber, C. Ferronato, B. Nozière, T. Peter and C. Marcolli, *Phys. Chem. Chem. Phys.*, 2023, **25**, 11055–11074.
- 2 K. A. Connors and J. L. Wright, *Analytical Chemistry*, 1989, **61**, 194–198.
- 3 N. Shardt, Y. Wang, Z. Jin and J. A. Elliott, *Chemical Engineering Science*, 2021, **230**, 116095.
- 4 L. Chunxi, W. Wenchuan and W. Zihao, *Fluid Phase Equilibria*, 2000, **175**, 185–196.
- 5 G. M. Wilson, *Journal of the American Chemical Society*, 1964, **86**, 127–130.
- 6 N. Shardt and J. A. W. Elliott, *Langmuir*, 2017, **33**, 11077–11085.
- 7 J. W. Belton, *Trans. Faraday Soc.*, 1935, **31**, 1413–1419.
- 8 J. W. Belton, *Trans. Faraday Soc.*, 1935, **31**, 1648–1652.
- 9 H. C. Boyer, B. R. Bzdek, J. P. Reid and C. S. Dutcher, *The Journal of Physical Chemistry A*, 2017, **121**, 198–205.
- 10 C. S. Dutcher, A. S. Wexler and S. L. Clegg, *The Journal of Physical Chemistry A*, 2010, **114**, 12216–12230.
- 11 A.-P. Hyvärinen, T. Raatikainen, A. Laaksonen, Y. Viisanen and H. Lihavainen, *Geophysical Research Letters*, 2005, **32**, L16806.
- 12 E. Martin, C. George and P. Mirabel, *Geophysical Research Letters*, 2000, **27**, 197–200.
- 13 N. Matubayasi, K. Tsunetomo, I. Sato, R. Akizuki, T. Morishita, A. Matuzawa and Y. Natsukari, *Journal of Colloid and Interface Science*, 2001, **243**, 444–456.
- 14 M. Nehma, J. M. Sangster and H. P. Schreiber, *Journal of Chemical & Engineering Data*, 1977, **22**, 156–158.
- 15 S. Alam, R. Ragupathy and A. B. Mandal, *Journal of Dispersion Science and Technology*, 2016, **37**, 1645–1654.
- 16 A. Bagheri and A. Abolhasani, *Korean Journal of Chemical Engineering*, 2015, **32**, 308–315.
- 17 C. Das, T. Chakraborty, S. Ghosh and B. Das, *Colloid Journal*, 2010, **72**, 788–798.
- 18 M. El Haber, C. Ferronato, A. Giroir-Fendler, L. Fine and B. Nozière, *Scientific Reports*, 2023, **13**, 20672.
- 19 V. Fainerman, R. Miller and E. Aksenenko, *Advances in Colloid and Interface Science*, 2002, **96**, 339–359.
- 20 N. Funasaki and S. Hada, *The Journal of Physical Chemistry*, 1979, **83**, 2471–2475.
- 21 B. Jańczuk, A. Zdziennicka, K. Szymczyk and M. L. González-Martín, *Colloids and Interfaces*, 2021, **5**, 53.
- 22 M. Mulqueen and D. Blankschtein, *Langmuir*, 1999, **15**, 8832–8848.
- 23 M. Mulqueen and D. Blankschtein, *Langmuir*, 2000, **16**, 7640–7654.
- 24 F. A. Siddiqui and E. I. Franses, *Langmuir*, 1996, **12**, 354–362.
- 25 K. Szymczyk, A. Zdziennicka, B. Jańczuk and W. Wójcik, *Colloids and Surfaces A: Physicochemical and Engineering Aspects*, 2005, **264**, 147–156.
- 26 K. Szymczyk and B. Jańczuk, *Colloids and Surfaces A: Physicochemical and Engineering Aspects*, 2007, **293**, 39–50.
- 27 K. Szymczyk and B. Jańczuk, *Langmuir*, 2007, **23**, 4972–4981.
- 28 K. Szymczyk and B. Jańczuk, *Langmuir*, 2010, **26**, 2491–2496.
- 29 K. Szymczyk, *Journal of Surfactants and Detergents*, 2011, **14**, 415–423.
- 30 K. Szymczyk, A. Zdziennicka, J. Krawczyk and B. Jańczuk, *The Journal of Chemical Thermodynamics*, 2014, **69**, 85–92.
- 31 A. Taraba and K. Szymczyk, *Annales Universitatis Mariae Curie-Skłodowska Chemistry Sectio AA*, 2017, **72**, 111–120.
- 32 G. Tyagi, D. Seddon, S. Khodaparast, W. N. Sharatt, E. S. Robles and J. T. Cabral, *Colloids and Surfaces A: Physicochemical and Engineering Aspects*, 2021, **618**, 126414.
- 33 L. Y. Zakharova, F. G. Valeeva, A. R. Ibragimova, V. M. Zakharov, L. A. Kudryavtseva, Y. G. Elistratova, A. R. Mustafina, A. I. Konovalov, S. N. Shtykov and I. V. Bogomolova, *Colloid Journal*, 2007, **69**, 718–725.

- 34 L.-H. Zhang and G.-X. Zhao, *Journal of Colloid and Interface Science*, 1989, **127**, 353–361.
- 35 L. Bartovská, M. Cechová, J. Matous and J. P. Novák, *Collection of Czechoslovak Chemical Communications*, 2000, **65**, 1487–1496.
- 36 P. Bošković, V. Sokol, T. Zemb, D. Touraud and W. Kunz, *The Journal of Physical Chemistry B*, 2015, **119**, 9933–9939.
- 37 H. F. Costa, H. Lourenço, I. Johnson, F. A. M. M. Gonçalves, A. G. M. Ferreira and I. M. A. Fonseca, *Journal of Chemical & Engineering Data*, 2009, **54**, 2845–2854.
- 38 R. S. Dzhambulatov, R. K. Dadashev, D. Z. Elimkhanov and I. N. Dadashev, *Russian Journal of Physical Chemistry A*, 2016, **90**, 1956–1959.
- 39 S. Enders, H. Kahl and J. Winkelmann, *Journal of Chemical & Engineering Data*, 2007, **52**, 1072–1079.
- 40 R. C. Ernst, C. H. Watkins and H. H. Ruwe, *The Journal of Physical Chemistry*, 1936, **40**, 627–635.
- 41 E. Golmaghani-Ebrahimi, A. Bagheri and M. Fazli, *Physics and Chemistry of Liquids*, 2018, **56**, 596–609.
- 42 D. Gómez-Díaz and J. M. Navaza, *Journal of Chemical & Engineering Data*, 2021, **66**, 2160–2166.
- 43 M. Hey and P. Kippax, *Colloids and Surfaces A: Physicochemical and Engineering Aspects*, 2005, **262**, 198–203.
- 44 I. Johnson, H. F. Costa, A. G. M. Ferreira and I. M. A. Fonseca, *International Journal of Thermophysics*, 2008, **29**, 619–633.
- 45 S. E. Kharin, A. Kniga and G. S. Sorokina, *Izvestiya Vysshikh Uchebnykh Zavedenii Khimiya iKhimicheskaya Tekhnologiya*, 1968, **12**, 1341–1344.
- 46 M. L. Kijevcanin, I. S. A. Ribeiro, A. G. M. Ferreira and I. M. A. Fonseca, *Journal of Chemical & Engineering Data*, 2003, **48**, 1266–1270.
- 47 M. Kijevcanin, I. Ribeiro, A. Ferreira and I. Fonseca, *Fluid Phase Equilibria*, 2004, **218**, 141–148.
- 48 S. Lamperski, *Journal of Colloid and Interface Science*, 1999, **213**, 360–370.
- 49 A. A. Rafati, A. Bagheri and M. Najafi, *Journal of Chemical & Engineering Data*, 2010, **55**, 4039–4043.
- 50 A. Rafati, A. Bagheri and M. Najafi, *The Journal of Chemical Thermodynamics*, 2011, **43**, 248–254.
- 51 B. Santos, A. Ferreira and I. Fonseca, *Fluid Phase Equilibria*, 2003, **208**, 1–21.
- 52 F. Beiranvand, S. H. Najibi and B. Hashemi Shahraki, *Iranian Journal of Oil and Gas Science and Technology*, 2020, **9**, 26–43.
- 53 M. Bielawska, A. Chodzińska, B. Jańczuk and A. Zdziennicka, *Colloids and Surfaces A: Physicochemical and Engineering Aspects*, 2013, **424**, 81–88.
- 54 B. R. Bzdek, J. P. Reid, J. Malila and N. L. Prisle, *Proceedings of the National Academy of Sciences*, 2020, **117**, 8335–8343.
- 55 S. Khosharay, M. Talebi, T. A. Saeed and S. S. Taghiani, *Journal of Molecular Liquids*, 2018, **249**, 245–253.
- 56 D. Kwaśniewska and J. Kiewlicz, *Journal of Saudi Chemical Society*, 2022, **26**, 101532.
- 57 D. Kwaśniewska and J. Kiewlicz, *Journal of Molecular Liquids*, 2022, **354**, 118917.
- 58 R. Wüstneck and R. Miller, *Colloids and Surfaces*, 1990, **47**, 15–21.
- 59 A. A. Dar, G. M. Rather, S. Ghosh and A. R. Das, *Journal of Colloid and Interface Science*, 2008, **322**, 572–581.
- 60 S. Helvacı, S. Peker and G. Özdemir, *Colloids and Surfaces B: Biointerfaces*, 2004, **35**, 225–233.
- 61 E. Matijević and B. A. Pethica, *Trans. Faraday Soc.*, 1958, **54**, 1382–1389.
- 62 H. Nakahara, O. Shibata and Y. Moroi, *The Journal of Physical Chemistry B*, 2011, **115**, 9077–9086.
- 63 G. Para, E. Jarek and P. Warszynski, *Colloids and Surfaces A: Physicochemical and Engineering Aspects*, 2005, **261**, 65–73.
- 64 M. J. Qazi, S. J. Schlegel, E. H. Backus, M. Bonn, D. Bonn and N. Shahidzadeh, *Langmuir*, 2020, **36**, 7956–7964.
- 65 J. P. Reid, B. J. Dennis-Smith, N.-O. A. Kwamena, R. E. H. Miles, K. L. Hanford and C. J. Homer, *Phys. Chem. Chem. Phys.*, 2011, **13**, 15559–15572.
- 66 M. C. K. Soule, P. G. Blower and G. L. Richmond, *The Journal of Physical Chemistry B*, 2007, **111**, 13703–13713.

- 67 J. W. Belton, *Trans. Faraday Soc.*, 1935, **31**, 1420–1425.
- 68 A. M. Booth, D. O. Topping, G. McFiggans and C. J. Percival, *Phys. Chem. Chem. Phys.*, 2009, **11**, 8021–8028.
- 69 S. Ekström, B. Nozière and H.-C. Hansson, *Atmospheric Chemistry and Physics*, 2009, **9**, 973–980.
- 70 M. Frosch, N. L. Prisle, M. Bilde, Z. Varga and G. Kiss, *Atmospheric Chemistry and Physics*, 2011, **11**, 3895–3911.
- 71 A.-P. Hyvärinen, H. Lihavainen, K. Hautio, T. Raatikainen, Y. Viisanen and A. Laaksonen, *Journal of Chemical & Engineering Data*, 2004, **49**, 917–922.
- 72 G. Kiss, E. Tombácz and H.-C. Hansson, *Journal of Atmospheric Chemistry*, 2005, **50**, 279–294.
- 73 H. D. Lee, A. D. Estillore, H. S. Morris, K. K. Ray, A. Alejandro, V. H. Grassian and A. V. Tivanski, *The Journal of Physical Chemistry A*, 2017, **121**, 8296–8305.
- 74 Z. Li, A. N. Schwier, N. Sareen and V. F. McNeill, *Atmospheric Chemistry and Physics*, 2011, **11**, 11617–11629.
- 75 R. Miles, M. Glerum, H. Boyer, J. Walker, C. Dutcher and B. Bzdek, *The Journal of Physical Chemistry A*, 2019, **123**, 3021–3029.
- 76 Y. Rublova, A. Kityk, F. Danilov and V. Protsenko, *Zeitschrift für Physikalische Chemie*, 2020, **234**, 399–413.
- 77 K. Sahu, V. F. McNeill and K. B. Eisenthal, *The Journal of Physical Chemistry C*, 2010, **114**, 18258–18262.
- 78 N. Sareen, A. N. Schwier, E. L. Shapiro, D. Mitroo and V. F. McNeill, *Atmospheric Chemistry and Physics*, 2010, **10**, 997–1016.
- 79 M. L. Shulman, M. C. Jacobson, R. J. Carlson, R. E. Synovec and T. E. Young, *Geophysical Research Letters*, 1996, **23**, 277–280.
- 80 D. O. Topping, G. B. McFiggans, G. Kiss, Z. Varga, M. C. Facchini, S. Decesari and M. Mircea, *Atmospheric Chemistry and Physics*, 2007, **7**, 2371–2398.
- 81 R. Tuckermann, *Atmospheric Environment*, 2007, **41**, 6265–6275.
- 82 J. Vanhanen, A.-P. Hyvärinen, T. Anttila, T. Raatikainen, Y. Viisanen and H. Lihavainen, *Atmospheric Chemistry and Physics*, 2008, **8**, 4595–4604.
- 83 J. Werner, M. Dalirian, M.-M. Walz, V. Ekholm, U. Wideqvist, S. Lowe, G. Ohrwall, I. Persson, I. Ripinen and O. Björneholm, *Environmental science & technology*, 2016, **50**, 7434–7442.
- 84 B. Svenningsson, J. Rissler, E. Swietlicki, M. Mircea, M. Bilde, M. C. Facchini, S. Decesari, S. Fuzzi, J. Zhou, J. Mønster and T. Rosenørn, *Atmospheric Chemistry and Physics*, 2006, **6**, 1937–1952.
- 85 L.-W. Chen, J.-H. Chen and N. F. Zhou, *J. Chem. Soc., Faraday Trans.*, 1995, **91**, 3873–3878.
- 86 B. Jańczuk, K. Szymczyk and A. Zdziennicka, *Molecules*, 2021, **26**, 4313.
- 87 K. Szymczyk, A. Zdziennicka and B. Jańczuk, *Journal of Molecular Liquids*, 2022, **345**, 117832.
- 88 S. Henning, T. Rosenørn, B. D’Anna, A. A. Gola, B. Svenningsson and M. Bilde, *Atmospheric Chemistry and Physics*, 2005, **5**, 575–582.
- 89 A. N. Schwier, N. Sareen, D. Mitroo, E. L. Shapiro and V. F. McNeill, *Environmental Science & Technology*, 2010, **44**, 6174–6182.
- 90 A. N. Schwier, G. A. Viglione, Z. Li and V. Faye McNeill, *Atmospheric Chemistry and Physics*, 2013, **13**, 10721–10732.
- 91 D. Góralczyk, K. Hac and P. Wydro, *Colloids and Surfaces A: Physicochemical and Engineering Aspects*, 2003, **220**, 55–60.
- 92 R. Tuckermann and H. K. Cammenga, *Atmospheric Environment*, 2004, **38**, 6135–6138.
